# Supplementary material
Source: publisher site journal article supplement (https://www.dovepress.com/get_supplementary_file.php?f=281198-2.xlsx)
Supplement: Supplementary file 1 [file get_supplementary_file.php]

## Sheet: Table S2
Dataset 2. The reserved peaks after denosing in GC-MS
ID	Peak	Similarity	R.T.	Count	Mass	29_1	60_1	28_1	16_1	26_1	6_1	15_1	23_1	22_1	21_1	14_1	5_1	19_1	4_1	24_1	17_1	20_1	18_1	11_1	9_1	13_1	27_1	1_1	8_1	10_1	25_1	3_1	12_1	7_1	2_1.1	MEAN case	50_1	48_1	47_1	58_1	44_1	56_1	39_1	45_1	38_1	52_1	57_1	43_1	46_1
4	Analyte 4	0	6.1792,0	51	281	3.7717e-05	4.09074e-10	7.09695e-05	6.487e-05	8.67691e-05	1.96134e-10	3.47496e-10	2.29769e-10	3.69644e-10	3.52643e-10	3.36251e-10	2.32747e-10	2.50734e-10	1.93412e-10	1.92321e-10	2.51893e-10	5.48023e-05	4.67462e-10	2.02699e-10	1.77865e-10	2.17118e-10	5.31294e-05	7.04066e-05	6.08203e-05	6.10902e-05	5.73675e-05	4.85639e-05	7.02267e-05	3.9343e-05	7.01662e-05	2.82082e-05	8.12025e-05	5.39583e-05	5.82778e-05	7.01209e-05	6.50563e-05	5.24736e-05	0.0001073	8.65445e-05	7.89793e-05	0.000122443	5.2559e-05	0.000114542	6.4273e-05
8	Analyte 8	437	6.30335,0	56	207	0.000281113	0.000307299	1.26684e-06	6.59964e-06	6.10063e-05	0.00017849	0.000256762	0.000262873	0.000392116	5.89207e-06	0.000483121	0.000346705	2.50734e-10	1.93412e-10	1.92321e-10	2.51893e-10	5.64886e-07	7.58718e-06	2.02699e-10	7.77961e-05	2.17118e-10	9.64784e-05	2.53227e-05	2.22728e-10	8.31619e-05	0.000204218	0.000113446	0.000112772	0.000138003	1.66621e-06	0.000114809	4.29156e-10	2.68005e-06	0.000187954	1.69055e-05	0.000249941	7.2546e-06	0.00023448	0.000182479	0.000200423	8.4559e-05	7.63576e-06	0.000512862	0.000496528
10	Analyte 10	402	6.36195,0	64	160	0.000411216	4.09074e-10	0.000773635	8.06678e-05	6.73983e-05	0.000265884	0.000329595	0.000160723	0.000272387	0.000245195	0.00170958	0.000118796	0.000265922	0.000181693	0.00015545	0.000208176	5.07913e-05	0.000257651	2.02699e-10	1.77865e-10	0.000139971	0.000226434	0.000419217	0.000193863	7.36474e-05	0.00119565	0.00022554	0.000121413	0.000263482	0.000347773	0.000292058	0.000231797	0.00124685	0.000673906	0.00076437	0.000934901	0.00073005	3.27053e-10	0.00184829	0.000940384	0.000824847	0.000655112	0.000458913	0.000415455
12	Analyte 13	0	6.48019,0	69	174	0.0181881	0.00849969	0.00934117	0.00933537	0.032697	0.0225529	0.0233033	0.017316	0.011102	0.0200904	0.0142624	0.0117798	0.0172066	0.0179803	0.0290697	0.0100185	0.0172154	0.0158801	0.0282599	0.0158755	0.038869	0.0223566	0.0250546	0.0237919	0.0298001	0.0292733	0.0385136	0.0391652	0.0330334	0.0249872	0.0218273	0.0051203	0.00653545	0.00693631	0.00548289	0.0117424	0.00784574	0.0163694	0.0099079	0.0116516	0.0299415	0.0129648	0.0113876	0.0100561
15	Analyte 17	0	6.5615,0	69	207	0.00178136	0.0026712	0.00109899	0.0015962	0.00261632	0.00131054	0.00192036	0.00108006	0.00133929	0.00147137	0.00153289	0.00132758	0.001566	0.00102257	0.00163871	0.00186266	0.00137069	0.0015588	0.00266423	0.00221738	0.00235206	1.87964e-10	0.00207466	0.00284289	0.00223829	0.00159543	0.00185703	0.00212818	0.00147376	0.0018139	0.00173411	0.00295197	0.0020873	0.00217578	0.001654	0.00216851	0.00143226	0.00242743	0.00258312	0.00243102	0.00307016	0.00118698	0.00352987	0.00251869
17	Analyte 19	421.267	7.29389,0	42	117	1.73992e-10	0.00122526	2.33903e-10	0.000151508	2.29143e-10	1.96134e-10	7.89917e-06	0.000616026	0.000750051	0.000918259	0.000460005	2.32747e-10	2.50734e-10	1.93412e-10	1.92321e-10	0.000944021	2.70507e-10	0.000695287	0.000296283	0.000269799	2.17118e-10	0.000581631	0.000502913	0.000496585	2.39935e-10	2.58808e-10	0.000325812	0.00089028	0.000205682	0.000479872	0.000327239	0.000627957	2.9087e-10	0.000785137	0.000405631	0.000573977	1.79445e-10	3.27053e-10	3.02577e-10	0.000367973	3.18323e-10	1.70644e-10	0.000533863	0.000508161
18	Analyte 20	234.588	6.65019,0	69	152	0.0133469	0.0172187	0.0094329	0.00911644	0.0184681	0.012418	0.0152573	0.0122869	0.00893868	0.0140147	0.0135222	0.00979438	0.0121372	0.0122715	0.0193103	0.0119297	0.00866977	0.0145026	0.0186208	0.0138341	0.0237346	0.0181476	0.0174554	0.0183032	0.015585	0.0166901	0.0240869	0.0224408	0.0162736	0.0168459	0.0151551	0.0147664	0.0127725	0.0111951	0.0114415	0.0168031	0.0101728	0.0186699	0.0145248	0.0134789	0.0234872	0.00877581	0.0174996	0.0143956
19	Analyte 21	0	6.71415,0	66	318	0.000100088	0.000165507	0.000223742	3.33485e-10	0.000195356	0.000214533	0.000188515	2.29769e-10	0.00022101	0.00021684	3.36251e-10	0.000137774	0.000119581	0.000213499	0.000269284	0.000165564	0.000111018	8.29234e-05	0.0004219	8.77849e-05	2.17118e-10	0.000288261	0.000502035	0.000297663	0.000168633	0.000406263	0.00046493	0.00054831	0.000373753	0.000514224	0.0002233	0.000260768	0.000162464	0.000160885	0.000127943	0.000214049	0.000128685	0.000202327	0.000208331	0.000198328	0.000345823	8.6076e-05	0.000244665	0.000429568
21	unknown	241.6	6.72617,0	65	157	1.73992e-10	4.09074e-10	6.89535e-05	4.37576e-05	0.000157088	7.81967e-05	0.000154848	7.06728e-05	4.12342e-05	9.83572e-05	6.93577e-05	6.56057e-05	0.000146083	7.14223e-05	0.000102424	0.000130069	5.61105e-05	0.000126597	9.11212e-05	5.13352e-05	0.00012718	8.49062e-05	9.16589e-05	0.000110627	0.000121452	0.00010648	0.000134201	7.96496e-05	8.29544e-05	2.14164e-10	8.54114e-05	0.000189455	0.000197245	0.000224925	0.000185337	0.000132964	1.79445e-10	0.000144886	0.000217279	0.000237743	0.000218246	1.70644e-10	0.000111886	0.000151348
27	Analyte 31	285	6.8128,0	69	207	0.00778687	0.00511883	0.00479256	0.00719697	0.016332	0.00794721	0.0110429	0.00929415	0.00363711	0.0082722	0.00797085	0.00702088	0.0104303	0.00813147	0.0147805	0.00814754	0.00597051	0.0020624	0.0111535	0.0090867	0.0114942	0.0127773	0.00827354	0.00993359	0.0133202	0.00865861	0.0129249	0.0118509	0.00875961	0.00841287	0.00908604	0.00528471	0.00507965	0.00573812	0.00423566	0.00903418	0.00626007	0.00742233	0.00608215	0.00797847	0.0154386	0.00845281	0.00718782	0.010221
30	2-keto-isovaleric acid 1	360.114	6.86122,0	69	174	1.73992e-10	0.000813466	0.0005211	0.00109741	0.00166277	0.000716833	0.000710603	0.000781954	0.000424385	0.000879987	0.000973013	0.00107302	0.000682002	0.00106329	1.92321e-10	0.0004996	0.00049474	0.000761664	0.00115887	0.000768729	0.000981467	1.87964e-10	0.000681673	0.000422808	0.00108156	0.000677338	2.05084e-10	0.00104397	0.000579193	0.000757386	0.000710295	1.65939e-05	0.00212379	0.00119548	0.000992561	0.00177887	0.000683364	0.000843511	0.00117449	0.00118746	3.18323e-10	0.000982634	0.000731474	0.00112419
31	unknown	727.833	6.94215,0	52	131	1.73992e-10	4.09074e-10	2.33903e-10	3.33485e-10	2.29143e-10	0.000101953	0.000198525	2.29769e-10	3.69644e-10	3.52643e-10	3.36251e-10	2.32747e-10	7.33298e-05	1.93412e-10	1.92321e-10	0.000190243	2.44712e-05	0.000160273	8.27188e-05	0.000185644	2.17118e-10	0.000316321	4.95883e-05	0.000150903	7.06512e-05	5.55862e-05	0.000223053	2.86053e-10	1.90325e-10	2.14164e-10	6.27755e-05	0.00242326	0.0024299	0.00312441	0.00287695	0.00303879	0.00168001	0.00258599	0.00269698	0.00178384	0.00386051	0.00350654	0.00213595	0.00301707
32	Analyte 36	390	6.93754,0	58	151	1.73992e-10	4.09074e-10	0.00764128	0.00574377	0.00310335	0.00762391	0.0116468	0.0201481	0.00100423	0.00947415	0.0146345	0.0236406	0.00940986	1.93412e-10	1.92321e-10	0.00310368	0.0052655	0.0135572	0.0201585	0.00980381	0.0233926	1.87964e-10	0.015071	0.00311862	0.0111935	0.0100761	0.0160373	2.86053e-10	0.00744774	0.00981023	0.00873688	0.00261451	2.9087e-10	0.00629506	0.022182	0.00501498	1.79445e-10	0.0120427	0.0054759	0.0116556	0.0246102	1.70644e-10	0.0182692	2.27276e-10
34	unknown	516.6	6.93514,0	69	117	0.0111352	0.00592279	0.00350342	0.00563972	0.00860762	0.00662671	0.00381845	0.00409593	0.00672841	0.00761491	0.00663791	0.00374606	0.00522087	0.00725954	1.92321e-10	0.00417096	0.00313817	0.00600253	0.00769136	0.00477499	0.00720565	1.87964e-10	0.00576174	0.00276409	0.0061009	0.00438299	0.0117016	0.00766185	0.00623332	0.00560282	0.00565835	0.00344572	2.9087e-10	0.00947884	0.00661571	0.00552784	0.00411088	0.0046287	0.00632189	0.00613137	0.0136128	0.00881517	0.00545722	0.00437767
35	2-hydroxybutanoic acid	844.625	6.98317,0	41	205	0.000311574	0.000134736	0.000366019	0.000269785	0.000402735	0.000402442	0.000246271	0.000500521	0.000188873	0.000268381	0.0003731	0.000156751	0.000581975	0.000488937	0.00071483	0.00042233	0.000223129	0.000394272	0.000537539	0.000116502	0.000391235	0.000575794	0.00029206	0.000320656	0.000597063	0.000451047	0.0007754	0.000365203	0.000389877	0.000316561	0.000385853	4.29156e-10	2.9087e-10	2.46268e-10	3.544e-10	3.74856e-10	1.79445e-10	3.27053e-10	3.02577e-10	2.76025e-10	3.18323e-10	1.70644e-10	4.97681e-10	2.27276e-10
36	Analyte 40	444.571	7.02052,0	69	221	0.00146118	0.000743836	0.000895521	0.00100061	0.00224763	0.00124431	0.00143888	0.00104072	0.000775518	0.00104424	0.000934146	0.00114921	0.00160691	0.00136084	0.00210837	0.00141153	0.00104843	0.000804663	0.002913	0.00204711	0.0028827	0.00290989	0.00214204	0.00274818	0.00226667	0.00158146	0.00258604	0.00289613	0.00174153	0.00245867	0.00171633	0.00117845	0.000957573	0.00110738	0.000601335	0.0011554	0.000782921	0.00103238	0.000996323	0.00101796	0.00195394	0.000979194	0.00101307	0.0016256
37	unknown	721.324	7.04827,0	69	190	0.00120363	0.000768288	0.00138186	0.000284813	0.00115124	0.000308576	0.00107134	0.000223451	0.000156635	0.000470217	0.000466932	0.000468356	0.00128916	0.000258462	0.000614933	0.000918079	0.000457276	0.000178376	0.000664167	0.000961731	0.00028813	0.00104682	0.000350525	0.000938047	0.000882069	0.00107101	0.000446727	0.000246698	0.000215053	0.000383583	0.000638872	0.000274475	0.0015416	2.46268e-10	0.00128382	0.000365039	0.000741371	0.000641016	0.00315392	0.00117165	0.000712336	0.00138085	0.00024854	0.000430917
43	oxalic acid	807.015	7.32587,0	69	147	0.00173669	0.00540347	0.00462132	0.00442446	0.00436278	1.96134e-10	0.00233876	0.00257426	0.00236817	0.0023115	0.00270685	0.00438168	0.00257952	0.00445047	0.00348376	0.00137812	0.00408812	0.00318234	0.0069455	0.00386686	0.00270125	0.00419304	0.00294132	0.0027215	0.00539011	0.00405581	0.00573807	0.00236595	1.90325e-10	0.00252903	0.00332802	0.00903121	2.9087e-10	0.00752954	0.00343398	0.00482942	0.00400592	0.0072752	0.00135323	2.76025e-10	3.18323e-10	1.70644e-10	0.00290096	0.00241982
47	unknown	290.333	7.36664,0	65	225	0.000415223	0.000988924	0.000904182	3.33485e-10	0.00150943	0.00177161	0.00103609	2.29769e-10	0.000867737	0.00107452	0.00165154	0.000860637	0.00136462	0.00125794	0.00126646	0.000901284	0.00087854	0.000991612	0.00134361	0.000694945	0.00154367	0.0011003	0.0017655	0.000799383	0.0014725	0.00196026	2.05084e-10	0.00165842	1.90325e-10	0.00178271	0.00106206	0.000459284	0.000612149	0.000104603	0.000549203	0.00121667	0.00044797	0.00117865	0.000559378	2.76025e-10	3.18323e-10	0.000416643	0.00109062	0.000666225
49	3-Hydroxypropionic acid 1	466.642	7.53914,0	69	116	0.0483714	0.0256074	0.0110406	0.0206732	2.29143e-10	0.0347322	0.0149349	0.0160062	0.0272893	0.0587526	0.0287786	0.0267756	0.021689	0.0388712	1.92321e-10	0.0389563	0.0155461	0.0568733	0.0160694	0.0172891	0.0267045	0.0336696	0.0139308	0.0183039	0.0191196	0.0103757	0.0510781	0.0268008	0.025848	0.0125004	0.0252196	0.077694	0.0754775	2.46268e-10	0.0599345	0.045752	0.0330953	0.0203819	0.0483243	0.0255529	0.05206	0.0183224	0.0251712	0.0255853
52	unknown	404	7.68038,0	66	146	0.000415668	0.00087716	0.000316581	0.00182503	0.00127804	0.000590034	0.0016156	0.00108813	0.00160696	0.00174255	0.000618584	0.00119926	0.000907256	0.000681557	0.00107479	0.000973882	0.000712399	0.00165448	0.000444828	0.00119381	0.000892279	0.000654898	0.000579529	0.0011354	0.00101072	0.000376785	2.05084e-10	0.000899373	0.000497632	0.000522662	0.000912863	0.00330635	0.000569378	0.000536519	0.000775153	0.000997245	0.000758388	0.000875103	0.000876342	0.000854207	0.00166523	0.000524364	0.002567	0.000876848
54	Analyte 65	0	7.73257,0	48	207	1.73992e-10	4.09074e-10	2.33903e-10	2.81182e-05	4.30479e-05	3.03825e-05	3.47496e-10	2.29769e-10	2.94815e-05	3.52643e-10	3.36251e-10	1.9032e-05	3.78749e-05	1.38965e-05	2.04974e-05	2.67535e-05	2.61667e-05	4.67462e-10	3.61689e-05	1.50361e-05	2.17118e-10	2.97138e-05	2.15301e-10	1.97551e-05	3.19491e-05	3.37802e-05	2.59975e-05	2.69903e-05	2.94671e-05	2.14164e-10	1.74704e-05	4.29156e-10	2.9087e-10	2.46268e-10	3.25818e-05	5.81243e-05	3.57095e-05	3.27053e-10	2.61763e-05	4.21494e-05	3.18323e-10	1.70644e-10	4.97681e-10	2.9847e-05
55	3-hydroxybutyric acid	397.341	7.74428,0	69	116	0.00124082	0.00532409	0.00365341	0.00477441	0.0034352	0.00280182	0.00440291	0.00347912	0.00496116	0.00436913	0.00405533	0.00312256	0.00284847	0.00306312	0.00293519	0.00239425	0.00177248	0.00504988	0.00136514	0.00196586	0.00213652	0.00170871	0.00250221	0.00245045	0.00246483	0.00395207	0.00399011	0.00225674	0.00230195	0.00236135	0.00310464	0.00448412	0.00236507	0.00229649	0.00353918	0.00365933	0.00197202	0.00421935	0.00371317	0.00349023	0.00474223	0.00153423	0.00725402	0.00213816
57	Analyte 69	250.136	7.70199,0	44	151	0.000370283	0.00070593	2.33903e-10	3.33485e-10	0.000682749	1.96134e-10	0.00100092	2.29769e-10	0.000757666	0.000840789	3.36251e-10	0.000588078	2.50734e-10	1.93412e-10	0.000605674	0.000491934	2.70507e-10	0.000799526	0.000253299	0.000300296	2.17118e-10	0.000332707	0.000439206	0.000552172	2.39935e-10	2.58808e-10	2.05084e-10	0.000771404	0.000657894	0.000388096	0.000351287	0.000769946	0.000482992	2.46268e-10	0.00037068	0.000830906	0.000245461	3.27053e-10	0.000314924	0.000510574	3.18323e-10	0.000211453	0.00092107	2.27276e-10
59	Analyte 72	0	7.8236,0	69	245	0.00717193	0.00126766	0.00175202	0.00196889	0.0107501	0.00117006	0.00647308	0.000972225	0.000416491	0.0040481	0.00109635	0.00381983	0.00670939	0.00125528	0.00549294	0.00572976	0.00685943	0.00184892	0.00820715	0.00680731	0.00282653	0.00929423	0.0010645	0.00702191	0.00918882	0.00299951	0.00212609	0.00309744	0.00139779	0.00113686	0.00413235	0.0041177	0.00331254	0.00364084	0.00225302	0.00102376	0.00335611	0.00147859	0.0036853	0.00451426	0.00360247	0.00476807	0.000887697	0.00428091
62	unknown	576.314	7.86272,0	54	131	0.000216192	4.09074e-10	0.000226972	3.33485e-10	0.000259269	0.00019956	9.19229e-05	0.000133228	8.18662e-05	0.000142816	0.00023943	0.000132301	0.000112745	1.93412e-10	1.92321e-10	0.000223741	0.00013141	4.67462e-10	2.02699e-10	1.77865e-10	0.000203055	1.87964e-10	0.000132225	0.000139675	0.000160906	2.58808e-10	2.05084e-10	0.000228165	0.000180609	0.000142273	0.000112612	0.000117837	2.9087e-10	0.000158813	3.544e-10	3.74856e-10	6.78145e-05	0.000236365	0.000123516	2.76025e-10	3.18323e-10	0.000178492	0.000315969	0.000117369
71	N-Methyl-DL-alanine	484.985	7.97954,0	69	130	0.00383561	0.0128335	0.00954758	0.0105828	0.00857066	0.00767672	0.00805613	0.00767147	0.0078884	0.00722132	0.0103261	0.00660529	0.00660291	0.00531376	0.00671355	0.0073845	0.00613715	0.0105251	0.0104325	0.00676269	0.00882699	0.00992102	0.0111676	0.00936985	0.00772665	0.0159182	0.00895541	0.0105949	0.00774102	0.0125278	0.00878124	0.00874283	0.00663251	0.00668745	0.00878169	0.00766383	0.00444056	0.0117559	0.0107526	0.00779647	0.0134219	0.00579481	0.0124323	2.27276e-10
76	unknown	163	8.13711,0	57	267	3.3334e-05	4.09074e-10	6.93963e-05	3.33485e-10	6.66787e-05	1.96134e-10	8.91917e-05	5.03115e-05	6.44326e-05	7.77362e-05	8.91425e-05	4.42203e-05	4.37409e-05	3.65071e-05	4.46798e-05	4.92298e-05	5.00643e-05	7.6018e-05	5.54853e-05	1.77865e-10	4.79999e-05	3.91318e-05	4.67041e-05	4.26419e-05	5.30026e-05	7.57331e-05	2.05084e-10	5.59501e-05	4.27248e-05	4.4812e-05	4.62957e-05	6.81845e-05	5.35619e-05	4.32469e-05	6.52315e-05	6.76218e-05	4.02862e-05	3.27053e-10	3.02577e-10	6.71805e-05	7.57184e-05	3.96003e-05	0.000112198	4.1977e-05
77	Lactamide 1	485.867	8.18238,0	61	104	1.73992e-10	0.00133393	0.000452518	0.00019247	2.29143e-10	9.25126e-05	0.000991227	2.29769e-10	0.000117047	3.52643e-10	3.36251e-10	2.32747e-10	0.000999096	9.14835e-05	1.92321e-10	0.000808523	2.70507e-10	0.000163462	0.00194288	0.000501041	0.000203929	1.87964e-10	0.000198929	0.00121132	0.000639023	0.000642805	0.000145133	0.000247679	9.09552e-05	0.000187588	0.000375119	0.000510634	0.00242529	0.00130733	0.00102136	0.000398575	0.00150439	0.000907187	0.00237048	0.00160135	0.0003426	0.00106887	0.00019038	0.000956693
78	2-amino-2-methylpropane-1,3-diol 2	214.1	8.22017,0	49	206	0.000108807	4.09074e-10	2.33903e-10	3.33485e-10	2.29143e-10	1.96134e-10	5.72067e-05	2.29769e-10	3.69644e-10	1.78666e-05	3.36251e-10	1.98092e-05	9.11722e-05	1.17262e-05	6.49088e-05	9.36455e-05	0.000139343	4.67462e-10	2.02699e-10	0.000121038	3.56259e-05	1.87964e-10	2.15301e-10	8.27656e-05	2.39935e-10	1.75671e-05	3.34252e-05	4.06731e-05	2.3549e-05	2.14164e-10	3.19711e-05	4.29156e-10	4.17501e-05	4.61725e-05	3.61147e-05	3.74856e-10	4.15287e-05	3.27053e-10	5.56165e-05	5.89118e-05	3.18323e-10	6.12875e-05	4.97681e-10	8.05408e-05
80	Analyte 102	264.833	8.25591,0	65	115	0.000185128	0.000152372	0.000108115	0.000125179	0.000223408	0.000161628	0.000184216	0.000129638	0.000120724	0.000191251	0.000147514	0.000144987	0.000250794	0.000150272	0.000188705	0.000205618	0.000154859	0.000117824	0.000158733	0.000204155	0.000224916	1.87964e-10	0.00011992	0.000191743	0.000165824	0.000214205	0.000231495	0.000228061	0.000178729	0.000128509	0.000166284	0.000145508	0.00010816	0.000103278	7.91381e-05	0.000140995	0.000136867	0.000199143	0.000141187	0.00020828	3.18323e-10	0.000160114	0.000164256	0.000148127
83	Analyte 105	255	8.34073,0	64	165	0.0168668	0.0360475	0.00808439	0.00167508	0.063926	0.0468152	0.0211183	0.0229886	0.0144319	0.00941109	0.0235658	0.0195975	0.0137079	0.034017	0.00380984	0.00774075	2.70507e-10	0.00668401	2.02699e-10	0.00784898	0.0141201	1.87964e-10	0.00502113	0.0258908	2.39935e-10	0.0108148	0.055349	0.0152344	0.0447106	0.00503631	0.0178171	0.0415341	0.015142	0.00749539	3.544e-10	0.0101103	0.0587516	0.00194999	0.0100264	0.000948605	0.0100752	0.0119568	0.0353795	2.27276e-10
84	Analyte 108	0	8.34504,0	38	147	0.0203224	0.0108292	0.00841466	0.00549383	0.012273	0.0146974	0.00568542	0.00658129	0.0040702	0.015971	0.0087944	0.00611069	0.012713	0.0150322	1.92321e-10	0.0214507	0.0136281	0.0199022	0.0170707	0.00963971	0.0212458	1.87964e-10	0.0102568	0.00933046	0.0138736	0.0106065	0.02386	0.0222799	1.90325e-10	2.14164e-10	0.0113378	0.00755667	2.9087e-10	2.46268e-10	3.544e-10	3.74856e-10	1.79445e-10	3.27053e-10	3.02577e-10	2.76025e-10	3.18323e-10	1.70644e-10	4.97681e-10	2.27276e-10
90	Analyte 116	0	8.42036,0	69	281	0.00183118	0.00302764	2.33903e-10	0.00203127	0.00158836	0.00105582	0.00303472	0.00229123	3.69644e-10	0.00217143	0.00361496	0.00104888	0.00285628	0.00165053	0.00148798	0.00233156	0.000976492	0.00222071	0.000829222	0.00133476	0.00204535	0.00122028	0.00151127	0.00171521	0.0011012	2.58808e-10	0.00232931	0.00217166	0.000943899	0.00143911	0.00166201	0.00424603	0.0019072	0.00151237	0.001286	0.00194006	0.000701112	0.00219794	0.00241152	0.00143502	0.00405424	0.000839354	0.00301673	0.0024253
92	Analyte 119	272.682	8.48161,0	58	220	5.28176e-05	4.09074e-10	2.33903e-10	5.60095e-05	2.29143e-10	5.07948e-05	1.55306e-05	6.33778e-05	3.69644e-10	3.15879e-05	3.36251e-10	2.60581e-05	5.21944e-05	3.22619e-05	8.63966e-05	5.2614e-05	2.70507e-10	4.67462e-10	3.27096e-05	1.77865e-10	5.01708e-05	3.73373e-05	2.15301e-10	3.66731e-05	2.39935e-10	2.58808e-10	5.50726e-05	6.21584e-05	7.08569e-05	2.14164e-10	2.88208e-05	3.36616e-05	4.18009e-05	3.8441e-05	2.28618e-05	4.09103e-05	2.73102e-05	4.23068e-05	2.20751e-05	5.13507e-05	8.69405e-05	3.09122e-05	4.97681e-10	4.06036e-05
94	Analyte 123	151.5	8.51695,0	62	84	0.000510071	0.000970587	0.000283628	0.000978306	0.00149383	1.96134e-10	3.47496e-10	0.00104262	3.69644e-10	3.52643e-10	0.000464912	0.000701024	0.00101526	1.93412e-10	1.92321e-10	0.000399629	0.000667403	0.00394189	0.000720193	0.000276884	0.00114538	0.000455954	2.15301e-10	0.00087988	0.000717768	0.000245137	2.05084e-10	0.0013445	0.000390206	2.14164e-10	0.000621502	0.00124576	2.9087e-10	2.46268e-10	0.000713986	0.00285836	0.000353385	0.000572843	0.00102277	0.00121619	0.00142926	0.000392489	0.0037568	2.27276e-10
96	Analyte 126	344.429	8.61551,0	69	221	0.000100272	0.00050655	0.0002834	0.000140333	0.000355076	0.000371115	0.000293635	0.000146595	0.000228016	0.000334863	0.000358723	0.000189222	0.000161701	0.000240442	0.00032063	0.000155016	0.000165147	0.000301425	0.000246062	0.000108803	0.000370991	0.000182563	0.000252004	0.000223868	0.000185846	0.000313124	2.05084e-10	0.000369296	1.90325e-10	0.000273789	0.000239284	0.000178948	0.000201831	0.000196718	0.000245696	0.000350362	0.00014293	0.000465638	0.000270359	0.000298773	0.000305405	0.000119904	0.0004907	0.000157627
97	Analyte 128	0	8.61881,0	53	267	1.73992e-10	4.09074e-10	2.33903e-10	3.46462e-05	4.07266e-05	1.96134e-10	4.73424e-05	2.28344e-05	3.1248e-05	5.78672e-05	4.3804e-05	2.28724e-05	2.50734e-10	2.10436e-05	2.45786e-05	2.37529e-05	2.79775e-05	4.24706e-05	2.90543e-05	1.77865e-10	4.12214e-05	2.39071e-05	2.85069e-05	2.22728e-10	2.55952e-05	2.71917e-05	2.27328e-05	3.82146e-05	1.90325e-10	2.14164e-10	2.25863e-05	6.94068e-05	3.12872e-05	2.46268e-10	4.55772e-05	3.71e-05	2.06195e-05	4.77932e-05	5.19283e-05	3.38809e-05	5.6993e-05	1.70644e-10	6.58998e-05	2.84239e-05
106	malonic acid 1	566.304	8.85469,0	64	147	0.00358855	4.09074e-10	0.00214295	0.00257319	0.00838811	0.00454502	0.00251073	0.00282947	0.00205264	0.00314767	0.00394763	0.00324635	0.00259588	0.00420598	1.92321e-10	0.00451805	0.0038846	0.00312448	0.00518378	0.00377788	0.00328555	1.87964e-10	0.00382801	0.00276446	0.00435736	0.00254137	0.00658831	0.00346901	1.90325e-10	2.14164e-10	0.00310323	0.0139729	0.00472043	0.00830335	0.00353995	0.00639642	0.00371866	0.0046773	3.02577e-10	0.00413271	0.00879496	0.00498903	0.00624679	0.00491146
109	Methylmalonic acid	478.848	8.97355,0	68	281	0.000213248	0.000270005	0.000193402	0.00025013	2.29143e-10	0.000265018	0.000335857	0.000185335	0.000210057	0.000281678	0.00021943	0.000215354	0.000264015	0.0001972	0.000306261	0.000243026	0.00027034	0.000275372	0.000362769	0.00027228	0.000324086	1.87964e-10	0.000257192	0.00031773	0.000294292	0.000230158	0.0002514	0.000332315	0.00024698	0.000237533	0.000244082	0.00035029	0.000234072	0.000252745	0.000147583	0.000286582	0.000164915	0.000288175	0.000242334	0.000269401	0.000307013	0.000128589	0.000395907	0.000349684
113	2-Hydroxyvaleric acid	748.147	9.03469,0	69	131	1.73992e-10	0.003525	0.00311894	0.00168295	2.29143e-10	0.006393	0.00313958	0.00403898	0.00392082	0.00383205	0.00359349	0.00877792	0.00374504	0.00621572	0.00873496	0.00941339	0.0040026	0.0108399	0.00732021	0.00314197	0.00711481	0.00693018	0.00433654	0.00687978	0.00457935	0.00376939	0.00900373	0.00724001	0.00550018	0.00405863	0.00516164	0.00279923	0.00740913	0.00550035	0.00568225	0.00925017	0.00516482	0.0107539	0.00692068	0.0114039	0.00916039	0.0037252	4.97681e-10	0.00423786
116	valine	906.397	9.11453,0	69	144	0.00357449	0.00361293	0.00165584	0.00192607	2.29143e-10	0.00333628	0.00210627	0.00280385	0.00177714	0.00344403	0.00270988	0.00222856	0.00297627	0.00410954	1.92321e-10	0.00375648	0.00287323	0.00359982	0.0028182	0.00311706	0.00240728	0.00326994	0.00231339	0.00264378	0.00316236	0.00196353	2.05084e-10	0.00242111	0.00279102	0.00218614	0.00251948	0.00272761	0.00330911	0.00561672	0.00386146	0.00766433	0.00268023	0.0038967	0.0040218	0.00451404	0.00642112	0.00285879	0.0047089	0.00269276
118	Analyte 159	474.316	9.21942,0	66	281	0.000173411	0.000304249	0.000180161	0.000255708	2.29143e-10	0.000198284	0.000277795	0.00019642	0.000211649	0.0002518	0.000207113	0.000176861	0.000240776	0.000182702	0.000244419	0.000192708	2.70507e-10	0.000208972	2.02699e-10	0.000176808	0.000208043	1.87964e-10	0.000195586	0.000214763	0.000300129	0.000197087	0.000203188	0.000254831	0.00018171	0.000147468	0.000186088	0.000269854	0.000204101	0.00021308	0.000224413	0.000227481	0.000153602	0.000215615	0.00021462	0.000213345	0.00029781	0.000172881	0.000406041	0.00019034
122	Analyte 164	570.667	9.2975,0	64	55	0.000797039	0.00051975	0.000396101	0.000172847	0.000978012	0.000592438	0.000316268	0.000154321	0.000312854	0.000774211	0.000574651	0.00014524	0.000510761	0.000522402	1.92321e-10	0.000981303	0.000641692	0.000760119	0.00101048	1.56932e-06	0.000721726	1.87964e-10	2.15301e-10	0.000320166	0.000689472	0.000482732	0.000751924	0.000743568	0.000531017	0.00054493	0.000498253	0.000405331	0.00100785	0.000759883	0.000525983	0.000754138	0.000242582	0.000355542	0.000965506	2.76025e-10	3.18323e-10	0.000471829	0.000988866	0.000458878
129	guaiacol	786.82	9.49232,0	51	166	0.000130224	4.09074e-10	2.33903e-10	0.000564039	0.000196215	0.000473689	0.000265633	0.000956909	3.69644e-10	3.52643e-10	0.000312122	0.000343147	0.000925328	1.93412e-10	0.000473726	0.000681714	2.70507e-10	4.67462e-10	2.02699e-10	0.000257133	2.17118e-10	0.0005121	0.000146345	0.000502354	2.39935e-10	0.000135659	2.05084e-10	6.84751e-05	0.000409453	2.14164e-10	0.000245142	4.29156e-10	0.000170655	2.46268e-10	3.544e-10	3.74856e-10	0.000256566	3.27053e-10	3.02577e-10	0.000157612	0.0010356	0.000305825	4.97681e-10	0.000197226
134	Analyte 181	301.895	9.59885,0	50	231	4.13359e-05	0.000111624	2.33903e-10	8.43513e-05	2.29143e-10	1.96134e-10	3.47496e-10	9.9137e-05	4.64603e-05	0.000113108	3.36251e-10	4.94855e-05	4.34112e-05	9.22501e-05	1.92321e-10	2.51893e-10	4.86561e-05	0.00015267	6.00958e-05	0.00012195	2.17118e-10	9.49152e-05	2.15301e-10	8.792e-05	2.39935e-10	2.58808e-10	0.00015281	8.91227e-05	6.21578e-05	2.14164e-10	5.17154e-05	4.29156e-10	0.000206163	0.000102754	0.000156194	0.000212668	8.8367e-05	0.00011071	3.02577e-10	9.1721e-05	2.49262e-05	1.70644e-10	4.97681e-10	7.59968e-05
143	Analyte 192	275.464	9.78729,0	67	231	0.000762529	0.00070951	0.000600395	3.33485e-10	0.00127284	0.000101029	0.00132218	2.29769e-10	4.57831e-05	0.000983036	0.000226066	0.000717696	0.000835489	0.000172054	0.000702198	0.000933225	0.000727489	0.000332785	0.000911581	0.00101237	0.000622977	0.00104224	0.000323052	0.00123473	0.00067798	0.000653626	0.000220769	0.000585936	8.0104e-05	0.000304532	0.000603807	0.0012212	0.00108006	0.00122048	0.00084776	0.000180217	0.000689369	0.000444933	3.02577e-10	0.00120451	0.000233422	0.000432725	0.000368216	0.00134089
145	unknown	379.371	9.81953,0	67	174	0.0632766	0.0656737	0.0479475	0.059143	2.29143e-10	0.0602226	0.0418474	0.0632996	0.0260791	0.0487772	0.0693968	0.0538959	0.0765445	0.0819671	0.0738836	0.0617439	0.0662921	0.0786917	0.0834613	0.0768687	0.0425278	0.0639387	0.0596654	0.0290425	0.0854774	0.0622346	2.05084e-10	0.0484637	0.053552	0.0570264	0.056698	0.0333042	0.0628425	0.0756933	0.069828	3.74856e-10	0.0484633	0.084145	0.042588	0.0879046	3.18323e-10	0.0632673	0.104485	0.0551965
149	leucine	699.188	9.88965,0	33	158	1.73992e-10	4.09074e-10	0.00154805	3.33485e-10	2.29143e-10	0.00298748	0.00202065	0.00303515	0.00164263	0.00848613	0.00289362	2.32747e-10	0.002881	0.00334331	1.92321e-10	0.00348511	0.0040975	4.67462e-10	0.00258971	0.0026481	2.17118e-10	1.87964e-10	0.00224019	0.00396034	0.00423466	0.00175107	0.00460039	2.86053e-10	0.00225253	0.00211301	0.00209369	0.00495839	2.9087e-10	2.46268e-10	0.00736633	3.74856e-10	1.79445e-10	3.27053e-10	3.02577e-10	2.76025e-10	3.18323e-10	1.70644e-10	4.97681e-10	0.00443657
169	Isoleucine	771.621	10.2133,0	60	158	0.00028246	0.00121565	0.000796711	0.000506646	2.29143e-10	0.00200023	3.47496e-10	0.000733992	0.000894886	0.000483846	0.000271545	0.000659541	0.00263485	0.00304349	0.00318267	0.0027088	0.00450502	0.00202838	0.000376729	0.00210464	0.000766833	0.00265165	0.00189063	0.001232	2.39935e-10	0.000294466	0.00413343	0.000877721	0.000328993	0.00120654	0.00139375	0.00240333	0.00184502	0.00476898	0.00140856	0.001611	0.00237635	0.00174177	0.00157767	0.00170519	0.00105265	0.000401003	0.00101347	0.00147629
178	Glycine-d5	381.889	10.388,0	58	174	1.73992e-10	0.105689	0.0744159	0.0413523	0.175136	0.0644717	0.0862564	0.111887	0.165095	0.100504	0.0714907	2.32747e-10	0.129754	0.137691	1.92321e-10	0.119162	0.137206	0.12792	0.0948868	0.119453	0.101997	0.0335221	0.136087	0.0703949	0.113852	0.0336765	2.05084e-10	0.124132	0.0931291	0.120769	0.0896643	0.0912923	0.0243737	2.46268e-10	0.163528	0.122906	0.12085	0.101334	0.200732	0.0242112	0.208541	0.13746	4.97681e-10	0.158654
188	succinic acid	852.184	10.497,0	38	147	0.0408811	0.00687957	0.0544862	0.00303377	2.29143e-10	0.0160972	0.00236507	0.00485203	0.0499207	0.00961152	0.0238772	0.00729541	2.50734e-10	0.0234632	0.0204075	2.51893e-10	2.70507e-10	0.0109724	2.02699e-10	1.77865e-10	0.0428497	0.0370855	0.0418523	2.22728e-10	2.39935e-10	0.032021	0.0374355	0.0485103	0.0110677	0.0327314	0.0185899	0.00698103	0.00479103	0.00581144	0.00614896	0.0113759	1.79445e-10	0.00936486	3.02577e-10	0.00170645	0.0374329	1.70644e-10	4.97681e-10	2.27276e-10
189	glycine 2	353.5	10.5047,0	35	240	1.73992e-10	0.000363574	0.000762292	0.000264095	2.29143e-10	0.000388587	3.47496e-10	0.000197677	0.00145192	0.000442355	0.000700121	0.000198937	2.50734e-10	1.93412e-10	0.000536981	2.51893e-10	2.70507e-10	0.000579947	2.02699e-10	1.77865e-10	0.000495693	1.87964e-10	2.15301e-10	2.22728e-10	2.39935e-10	0.000393747	2.05084e-10	0.00039139	0.000274752	2.14164e-10	0.000248069	4.29156e-10	2.9087e-10	2.46268e-10	0.000277895	3.74856e-10	1.79445e-10	0.000436212	3.02577e-10	9.66019e-05	0.000517453	1.70644e-10	0.00059186	2.27276e-10
192	2,3-Dihydroxypyridine	294.032	10.5357,0	66	254	0.000912196	0.000234503	0.00059782	0.000624384	0.00149401	0.000664871	0.000138742	0.000679313	0.00138457	0.000212068	0.000800334	0.000683998	0.00115216	1.93412e-10	0.000781739	2.51893e-10	2.70507e-10	0.000112515	0.000893503	0.000908542	0.000139242	1.87964e-10	0.000307055	0.00131436	2.39935e-10	0.000284304	2.05084e-10	0.000135258	0.000526659	0.000436386	0.000513951	0.000144679	4.36783e-05	6.00392e-05	0.00013958	8.68509e-06	0.000192396	0.000222028	0.000120496	5.10774e-05	0.000885337	0.000366741	0.000237428	0.000301586
196	Bis(2-hydroxypropyl)amine 1	249.161	10.5932,0	65	210	0.00956502	0.00267134	0.0140412	0.00302217	2.29143e-10	0.0033506	0.00144236	0.00450106	0.0100654	0.00229516	0.00466161	0.00776353	0.00582002	0.0101844	0.00917955	0.011696	2.70507e-10	0.00216206	0.00555311	0.0151844	0.00586186	1.87964e-10	0.013163	2.22728e-10	2.39935e-10	0.00943983	2.05084e-10	0.00656881	0.00363387	2.14164e-10	0.00539421	0.00466144	0.000489333	0.000997268	0.00061402	0.000904614	0.00124512	0.000586618	0.0042749	0.00154869	0.00592586	0.00141158	0.00293386	0.00190118
198	unknown	654.551	10.6427,0	50	55	1.73992e-10	0.000886125	0.00197995	0.00179337	0.000721613	1.96134e-10	3.47496e-10	2.29769e-10	0.00185091	0.000650149	3.36251e-10	0.000609859	2.50734e-10	0.00121483	0.000869297	2.51893e-10	0.000299599	0.000896269	2.02699e-10	1.77865e-10	0.000546066	1.87964e-10	0.000360011	2.22728e-10	0.000538915	0.00178782	2.05084e-10	0.000581245	0.000969029	2.14164e-10	0.000551835	0.000712962	0.000372845	0.000769935	0.000840614	0.000935827	0.000878232	0.000763277	0.000801665	0.000549877	0.00202874	0.000861718	0.00115645	0.00140469
200	D-Glyceric acid	908.016	10.6694,0	65	189	1.73992e-10	0.000750446	2.33903e-10	0.000790136	0.00105628	0.000986591	0.00171049	0.00036052	0.00348723	0.00568077	3.36251e-10	0.000314252	0.00121124	0.00137055	0.00305805	2.51893e-10	2.70507e-10	0.000735245	2.02699e-10	1.77865e-10	0.00144332	1.87964e-10	2.15301e-10	6.25551e-06	2.39935e-10	2.58808e-10	2.05084e-10	0.00153871	0.000825111	2.14164e-10	0.000844173	0.000462257	0.00306239	0.0010676	0.000644013	0.000959599	0.000749266	0.000570564	0.00189599	0.00180917	0.00214318	0.000485009	0.000954525	0.00154177
205	2,2-Dimethylsuccinic Acid	581.74	10.74,0	50	147	1.73992e-10	0.000611748	2.33903e-10	0.00180061	2.29143e-10	0.000898381	3.47496e-10	0.000348695	0.00213535	0.00163549	0.00172933	2.32747e-10	2.50734e-10	1.93412e-10	0.00217785	2.51893e-10	0.00093853	0.000455945	2.02699e-10	1.77865e-10	0.000582366	1.87964e-10	0.00150864	2.22728e-10	0.000681228	2.58808e-10	2.05084e-10	0.000594323	0.000714053	0.00176515	0.000619257	0.00257961	2.9087e-10	2.46268e-10	0.000787113	0.000475465	1.79445e-10	0.000886823	0.00195259	2.76025e-10	0.00117821	0.00121632	4.97681e-10	0.00291967
209	uracil	879.569	10.8313,0	66	99	0.01276	0.00183567	2.33903e-10	0.00300017	0.00641341	0.00459181	0.00445731	0.0105394	0.00556456	0.00220416	3.36251e-10	0.00395698	0.0157645	1.93412e-10	0.0138635	0.00905339	0.00674656	0.00908843	2.02699e-10	0.0134975	0.00290435	1.87964e-10	0.00164635	0.0046222	0.00773256	2.58808e-10	2.05084e-10	0.00312076	0.00387234	0.00579803	0.00510113	0.00356639	0.00307111	0.00575458	0.00295416	0.00347772	0.00553362	0.00760589	0.00127558	0.000516026	0.00811038	0.00125987	0.00373875	0.00606181
210	unknown	524.746	10.8366,0	68	117	1.73992e-10	0.00803763	0.026229	0.00599135	0.00803121	0.0077637	0.00615834	0.00853343	0.00948828	0.0100833	3.36251e-10	0.00373811	0.00518788	1.93412e-10	1.92321e-10	0.00579005	0.0128737	0.00800903	2.02699e-10	0.00906669	0.00872433	0.0107291	0.00357269	0.00613762	0.0133773	0.0208859	2.05084e-10	0.00939191	0.00636744	0.0148615	0.00763431	0.00316352	0.0116525	0.0059217	0.00690643	0.0108403	0.0116516	0.00877578	0.00457234	0.0177336	0.0158961	0.00187725	0.00434562	0.0136498
212	Allylmalonic acid	646.881	10.8761,0	60	215	1.73992e-10	0.000147569	0.00015285	7.08846e-05	6.92915e-05	1.96134e-10	4.46202e-05	3.31694e-05	0.000169402	7.30734e-05	3.36251e-10	5.3936e-05	7.25463e-05	6.60143e-05	1.92321e-10	0.00014855	6.67967e-05	8.53168e-05	0.000181139	1.77865e-10	9.60081e-05	1.87964e-10	0.000101164	5.65445e-05	5.46593e-05	2.58808e-10	0.000125885	7.88987e-05	3.88299e-05	0.000128822	7.05324e-05	0.000101359	0.000151859	8.906e-05	0.000139566	0.000174074	0.000114689	0.000104702	7.8105e-05	2.76025e-10	0.000117415	1.8985e-05	0.000113346	0.00015554
215	Analyte 292	271.2	10.9237,0	41	217	0.000132165	4.09074e-10	5.64893e-05	3.33485e-10	2.29143e-10	1.96134e-10	3.47496e-10	3.42068e-05	6.20283e-07	3.52643e-10	0.00029958	2.42806e-05	2.50734e-10	4.23886e-05	0.00016013	2.51893e-10	2.70507e-10	6.02366e-05	2.02699e-10	0.000135663	4.72329e-05	0.000166544	2.15301e-10	2.22728e-10	4.88278e-05	2.58808e-10	9.18931e-05	2.86053e-10	3.53621e-05	2.14164e-10	4.45208e-05	4.29156e-10	5.65765e-05	2.46268e-10	3.544e-10	3.74856e-10	7.54671e-05	5.40564e-05	3.02577e-10	5.74704e-05	5.00823e-05	1.70644e-10	4.97681e-10	2.49852e-05
216	Itaconic acid	470.964	10.9663,0	63	117	1.73992e-10	0.00781995	2.33903e-10	0.00734624	2.29143e-10	0.0145298	0.0022292	0.00908094	0.00182563	0.00753132	3.36251e-10	0.00340891	0.00538059	0.0255624	1.92321e-10	0.0214133	0.0178625	0.0117525	2.02699e-10	0.012226	0.0103931	1.87964e-10	0.0245858	0.00979024	0.0204407	2.58808e-10	2.05084e-10	0.0112218	0.0122649	0.0358568	0.00908409	0.00297693	0.00905503	0.00350797	0.00912593	0.0141991	0.0180532	0.0139285	0.0110942	0.0209607	0.00912833	0.0226568	0.0122589	0.00807304
218	fumaric acid	675.224	10.9942,0	68	245	0.000474057	0.000509778	0.00107428	0.000510007	2.29143e-10	0.000472508	0.000137899	0.000306116	0.000416549	0.000393566	0.0011916	0.000304096	0.000393663	0.000499036	1.92321e-10	0.000514935	0.000564621	0.00049064	0.000920527	1.77865e-10	0.000671064	1.87964e-10	0.000640795	0.000336521	0.000505944	2.58808e-10	0.00164969	0.000662031	0.000422277	0.00112168	0.000506129	0.000277109	0.00123466	0.000235111	0.000594985	0.000724253	0.000844368	0.000456735	0.000511044	0.00101881	0.000780177	0.00048988	0.000546754	0.000296877
219	unknown	290.923	11.0331,0	55	58	0.00430687	0.00358508	2.33903e-10	0.000226367	2.29143e-10	0.000625854	0.0012563	0.00125404	3.39064e-05	0.00188225	0.00811614	2.32747e-10	2.50734e-10	1.93412e-10	0.00525571	0.00610875	0.00520517	0.00363736	0.0027097	1.77865e-10	0.00435055	1.87964e-10	0.000968248	0.00246426	0.00456995	0.00660499	2.05084e-10	0.00531649	1.90325e-10	0.00153925	0.00233391	0.00150443	0.00620798	0.00101028	0.000345557	0.00131768	1.79445e-10	0.000900314	0.00436109	0.00764632	3.18323e-10	0.00405669	4.97681e-10	0.00114776
220	unknown	294	11.0474,0	37	97	0.000113186	0.000109248	0.000479102	3.33485e-10	9.5712e-05	1.96134e-10	3.47496e-10	2.29769e-10	3.69644e-10	3.52643e-10	3.36251e-10	2.32747e-10	0.000102219	1.93412e-10	1.92321e-10	2.51893e-10	0.000492476	4.67462e-10	0.000151871	1.77865e-10	7.78376e-05	1.87964e-10	0.000140339	0.000156883	0.000426291	2.58808e-10	2.05084e-10	2.86053e-10	1.90325e-10	2.14164e-10	7.81723e-05	4.29156e-10	0.000167723	2.46268e-10	6.73472e-05	3.74856e-10	0.000248234	3.27053e-10	0.000241293	0.000219634	3.18323e-10	0.000135576	4.97681e-10	3.12933e-05
222	serine 1	914.222	11.0785,0	64	218	0.0325608	0.0206337	0.0251118	0.00775542	2.29143e-10	0.01978	0.00272797	0.00891592	0.0129806	0.0240548	0.0332833	0.0257302	0.0183462	0.030412	1.92321e-10	0.0296084	0.0134822	0.0199713	0.00792001	0.0229508	2.17118e-10	0.0145945	0.0118619	0.0181751	0.0117515	2.58808e-10	0.0333168	0.0141349	0.0163102	0.00444458	0.0160272	0.019397	0.0265403	0.0297792	0.0185055	0.025823	0.0266867	0.0258208	0.0381823	0.0315497	0.0455315	0.0204908	0.0289692	0.0192794
226	Citraconic acid 4	464.303	11.1181,0	35	160	0.000863645	4.09074e-10	2.33903e-10	7.567e-05	0.000494364	1.96134e-10	3.47496e-10	2.29769e-10	0.000247607	0.000104628	0.00175058	3.46604e-05	0.000197914	1.93412e-10	2.92182e-05	0.000202773	2.70507e-10	0.000164472	0.00099041	6.98471e-05	0.00017037	0.000946385	0.000596192	0.000276653	8.27125e-05	2.58808e-10	0.00010574	0.00021393	0.000126268	0.000517918	0.000275398	0.000217166	2.9087e-10	5.76219e-05	0.000521327	0.000806122	1.79445e-10	3.27053e-10	3.02577e-10	2.76025e-10	3.18323e-10	1.70644e-10	4.97681e-10	2.27276e-10
227	Geraniol	194.556	11.1469,0	57	156	0.000493623	0.000367945	0.000267304	0.000201026	0.000932884	0.000327789	0.000776436	0.000311065	0.000247338	0.000326611	0.000574543	0.000173798	0.000262141	0.000430446	1.92321e-10	0.000529088	0.000658823	0.000333276	0.000496267	0.000649423	0.000291099	0.000222734	0.000155982	0.000143414	2.39935e-10	2.58808e-10	0.00020106	0.00022927	0.000172763	0.000147443	0.000330786	0.000286878	2.9087e-10	0.000278553	0.000818192	0.00115199	1.79445e-10	0.000336715	0.000428922	2.76025e-10	0.0005894	0.000660168	0.000337464	0.000279358
228	Analyte 313	218.432	11.1715,0	56	255	6.33706e-05	7.54408e-06	2.33903e-10	1.64591e-06	5.71709e-05	5.37342e-05	3.47496e-10	3.8772e-05	3.69644e-10	5.32141e-05	9.59358e-05	3.20381e-05	2.50734e-10	6.44698e-05	0.000133886	6.37563e-05	0.000101223	6.22509e-05	0.000100564	7.40259e-05	4.3272e-05	8.38573e-05	4.61499e-05	2.22728e-10	1.83999e-06	0.000175866	6.43194e-05	3.5741e-05	3.59392e-05	4.65418e-05	5.12376e-05	8.03075e-05	0.000177363	3.4858e-05	3.544e-10	3.74856e-10	0.000128173	8.55068e-05	3.02577e-10	2.76025e-10	0.000112252	8.58962e-05	8.45586e-05	3.83328e-05
235	Analyte 326	222.308	11.3077,0	52	171	2.4152e-05	9.78353e-06	2.33903e-10	0.000156658	1.50144e-05	1.96134e-10	3.47496e-10	2.37964e-05	3.12351e-05	3.771e-05	9.81711e-05	4.54187e-05	2.50734e-10	2.79814e-05	3.97892e-05	8.38963e-05	2.70507e-10	1.9845e-05	2.02699e-10	4.95408e-05	1.56883e-05	3.85235e-05	5.82926e-05	3.29707e-05	4.54557e-05	2.58808e-10	6.12326e-05	1.68632e-05	1.27757e-05	6.08723e-05	3.35223e-05	4.29156e-10	6.76014e-05	7.38917e-05	3.544e-10	3.74856e-10	1.79445e-10	3.27053e-10	4.32463e-05	7.75545e-05	4.37617e-05	3.174e-05	1.92724e-05	6.22052e-05
241	L-Allothreonine 1	920.077	11.4128,0	27	57	1.73992e-10	0.0154381	0.00618999	0.00618763	0.00176822	0.0108796	3.47496e-10	0.00530777	0.0107418	0.0206489	0.0122859	0.0114103	0.00944669	0.0157362	1.92321e-10	0.0178835	0.0105108	0.0168957	0.00717823	0.00914356	2.17118e-10	0.00766223	2.15301e-10	2.22728e-10	2.39935e-10	2.58808e-10	2.05084e-10	2.86053e-10	1.90325e-10	2.14164e-10	0.0065105	4.29156e-10	2.9087e-10	2.46268e-10	3.544e-10	3.74856e-10	1.79445e-10	3.27053e-10	3.02577e-10	2.76025e-10	3.18323e-10	1.70644e-10	4.97681e-10	2.27276e-10
261	hydroquinone	747.883	11.6781,0	61	239	0.000264932	4.09074e-10	0.000339868	3.33485e-10	2.29143e-10	0.0001652	3.47496e-10	0.000193903	0.000307956	0.000239412	0.000273005	0.000299205	0.000291117	1.93412e-10	0.000470886	0.00025022	0.000159714	0.000323157	0.00024112	0.000215755	2.17118e-10	0.000269541	0.000196695	0.000114094	2.39935e-10	0.000350708	2.05084e-10	2.86053e-10	0.000155044	0.000198914	0.000177348	0.000429237	2.9087e-10	0.000256334	0.000148688	0.000124999	0.00017128	0.000151959	3.02577e-10	0.000287233	3.18323e-10	1.70644e-10	0.000226827	2.27276e-10
262	Analyte 355	413.6	11.6889,0	48	243	0.000123923	4.09074e-10	0.000226639	6.28043e-05	0.000292707	9.8763e-05	3.47496e-10	1.36827e-06	0.000211457	3.25892e-05	0.000139214	0.000357389	2.50734e-10	0.000104912	0.0001809	0.000134574	8.32668e-05	4.67462e-10	2.02699e-10	4.1527e-05	2.17118e-10	1.87964e-10	2.15301e-10	0.000116787	5.68335e-05	2.58808e-10	0.000161374	2.86053e-10	9.42355e-05	8.91524e-05	8.7014e-05	0.000200319	0.000151254	0.000319881	7.16742e-05	3.74856e-10	7.93585e-05	3.27053e-10	7.07418e-05	5.56559e-05	0.000214459	1.70644e-10	4.97681e-10	1.38301e-05
270	Analyte 365	0	11.7427,0	68	103	0.0146199	0.00793319	0.0104792	0.00582134	0.0235467	0.0189068	0.023834	0.00377513	0.00770821	0.00780591	0.00697805	0.00614079	0.00605697	0.0103586	0.0134567	0.0104911	0.0138504	0.00510315	0.0100411	0.00716301	0.00769821	0.0172937	0.0185405	0.00401094	0.00680065	0.014909	0.0151406	0.00831582	0.0159401	0.0184035	0.0113708	0.0126841	0.0117564	0.0237729	0.00741403	0.0103373	0.00959946	0.0098275	0.0110353	0.0112979	0.038603	0.0232898	0.009179	0.00900616
281	beta-Alanine 2	862.403	11.9572,0	68	174	0.000289983	0.00033909	0.000141713	5.48869e-05	0.00132084	0.000202283	3.47496e-10	0.000342317	0.0012609	0.000156195	0.000562356	5.80011e-05	0.000177132	0.000319032	0.000533346	0.000891831	0.000251209	0.00051738	0.000126048	9.73071e-05	0.000278919	1.87964e-10	0.000503812	0.000102554	0.000171418	0.000225788	0.000457054	0.000290923	0.000178313	0.000500224	0.000345029	4.29156e-10	0.000955656	2.46268e-10	0.000634436	0.000376929	0.000533752	0.000523322	0.00106671	0.0001779	0.00179542	1.70644e-10	0.000236126	0.000745504
286	2-Deoxytetronic acid	905.762	12.0118,0	64	73	0.069433	0.0682892	0.0385747	0.0162223	2.29143e-10	1.96134e-10	0.0709992	0.0172355	0.0319023	0.0442932	0.0826911	0.0269197	0.0314144	0.0513687	1.92321e-10	0.0416057	0.0705954	0.0364623	0.043551	0.0605049	0.0321259	0.106581	0.083155	0.00904446	0.0715923	0.0585187	0.0775821	0.0368074	0.136691	0.084927	0.0499696	0.0795122	0.0517793	0.105583	0.0422444	0.0661018	0.0425148	0.0400905	0.0440515	0.0552665	3.18323e-10	0.101868	0.0494025	2.27276e-10
293	D-erythronolactone 1	278.167	12.1261,0	54	82	0.00104322	0.0103929	2.33903e-10	0.00048654	0.00143632	1.96134e-10	3.47496e-10	0.000433518	0.00540314	0.00279595	0.000769306	2.32747e-10	0.000810782	1.93412e-10	0.00293738	0.00106249	0.000726823	4.67462e-10	2.02699e-10	0.000822275	2.17118e-10	0.00301693	0.00299403	2.22728e-10	0.000715344	2.58808e-10	2.05084e-10	2.86053e-10	1.90325e-10	0.00311844	0.00129885	4.29156e-10	0.00530717	0.00307302	0.00200771	3.74856e-10	0.00189585	0.000793625	0.00322662	0.00237807	3.18323e-10	0.00234763	0.00272631	0.00520461
304	Erythrose 1	525.844	12.2841,0	65	350	0.0121015	4.09074e-10	0.00943713	0.000268677	0.00110523	0.00243738	0.00221707	0.0017224	0.00126847	0.000919104	0.0119792	0.000603442	0.00228141	0.00232031	0.00204648	0.00238329	0.000668676	0.00110038	0.00329043	0.000460674	0.00162557	0.00480394	0.00420513	0.00569454	0.00120943	0.0152499	0.00435049	0.00191918	0.00270947	0.00515284	0.00351772	0.00816385	0.0154175	0.00880368	0.00633237	0.00890918	0.00983293	0.0211304	0.018669	2.76025e-10	0.026496	0.0137666	0.00142013	0.00875701
306	3-Aminoisobutyric acid 1	734.357	12.3537,0	61	174	1.73992e-10	0.00409047	0.00456566	0.00157299	2.29143e-10	0.00151803	0.165906	2.29769e-10	0.0905176	0.00342817	0.0112736	0.00920915	0.00265155	0.00535238	0.0266734	2.51893e-10	0.00175181	0.0136203	0.0643479	0.0136891	0.129238	0.00403587	2.15301e-10	0.0107441	0.00297302	0.00908704	0.00810957	0.14436	0.00153581	0.00436775	0.0244873	0.0351278	0.0133288	0.00709719	0.00300916	0.0779886	0.0570101	0.0310968	0.00446229	0.15355	3.18323e-10	1.70644e-10	0.0699376	0.00981687
312	unknown	628.595	12.4917,0	43	73	1.73992e-10	0.0321335	0.0647435	0.00306258	0.0397255	0.0231434	0.016695	0.022025	0.0178688	0.0227311	3.36251e-10	0.0115981	2.50734e-10	0.0245689	0.026822	0.0143386	0.00914335	0.00931674	0.0275586	0.00793971	0.0120358	0.0491913	0.0460471	2.22728e-10	0.0193454	2.58808e-10	2.05084e-10	0.017765	1.90325e-10	0.0491802	0.0188993	0.00368957	0.0359831	2.46268e-10	0.0299693	3.74856e-10	0.0327568	0.0278886	0.0617186	0.0318695	0.0609197	0.0575414	0.0122047	0.0655004
317	(S)-Mandelic acid	551.6	12.5661,0	51	179	0.000131407	6.81967e-05	2.33903e-10	4.58872e-05	0.000133177	0.000129737	3.47496e-10	0.000113463	3.69644e-10	3.52643e-10	9.58932e-05	0.00032243	7.14162e-05	0.000142242	8.27968e-05	2.51893e-10	5.96106e-05	5.54385e-05	5.69413e-05	9.37832e-05	2.17118e-10	1.87964e-10	2.15301e-10	0.000241502	9.28652e-05	9.21921e-05	0.00020705	2.86053e-10	0.000119026	0.000123445	8.26168e-05	4.29156e-10	0.000112506	2.46268e-10	0.000103868	0.000139914	9.94523e-05	5.12655e-05	9.33002e-05	0.000123742	3.18323e-10	0.000131279	9.27557e-05	0.000235689
323	L-Malic acid	784.947	12.7075,0	40	55	0.00130129	0.000389035	0.000869453	1.70547e-05	0.000425848	0.000421914	3.47496e-10	2.60559e-05	3.69644e-10	3.52643e-10	0.000601762	0.00151142	0.000403612	0.000840821	0.00148776	2.51893e-10	3.94302e-05	0.000900414	0.000182393	1.77865e-10	0.00120746	1.87964e-10	0.000586242	0.000676503	0.000240019	0.00115563	0.000102294	0.00133183	1.90325e-10	2.14164e-10	0.000490608	0.0017914	2.9087e-10	0.00223364	0.000509345	3.74856e-10	0.000437914	0.000372466	0.000439677	2.76025e-10	0.00225113	0.000549842	4.97681e-10	2.27276e-10
332	Threitol	934.06	12.8345,0	68	217	0.0124629	0.00352139	0.00716875	0.012639	0.0101425	0.012758	0.0214303	0.00463917	0.00452803	0.00322003	0.00647197	2.32747e-10	0.00418159	0.00925936	0.00692143	0.00361871	0.00425009	0.00382088	0.0120569	0.00568737	0.00454571	0.00805286	0.0111009	0.0166809	0.00781299	0.00969734	0.0151314	0.00502822	0.00971359	0.0120798	0.0082874	0.00284869	0.00706147	0.00663239	0.00256008	0.0048641	0.00528382	0.00433503	0.00508501	0.00479	3.18323e-10	0.0107574	0.00678891	0.00642755
338	Analyte 479	0	12.9485,0	65	217	0.0628332	0.0380715	0.059962	0.0225523	0.0611005	0.0530328	0.0536357	0.0677362	0.0321176	0.0348284	0.0319562	0.0770643	0.0461036	0.0546777	0.0650605	0.0490363	2.70507e-10	0.0358496	0.0560534	0.0563754	0.0243237	0.0683892	0.0464909	0.0844703	0.0657749	0.0750408	0.0709041	0.026466	0.0397659	0.0437046	0.0501126	0.0352522	0.0548095	0.0685482	0.0362618	0.0439199	0.0411024	0.0337579	0.0401939	0.0577351	0.0325669	0.0512643	0.0305309	0.0371191
341	adipic acid	513.6	12.9711,0	56	111	1.73992e-10	0.00110235	0.00183325	0.000520284	2.29143e-10	0.00203516	0.00103328	2.29769e-10	0.000550872	0.00112344	0.000910135	2.32747e-10	2.50734e-10	0.00193723	1.92321e-10	0.000866748	2.70507e-10	0.000880861	2.02699e-10	0.000987359	0.00120613	1.87964e-10	2.15301e-10	0.00245594	0.00244224	0.00235679	0.00252534	0.00133847	0.00202054	2.14164e-10	0.000937548	0.000916182	0.00152413	0.0014954	0.00121039	0.00166267	0.00124255	0.000820517	0.000967079	0.00129	3.18323e-10	0.0011121	0.000771077	0.00139408
343	asparagine 4	699.407	12.9861,0	55	128	0.000715067	0.00115719	0.00040253	0.000327542	0.00100473	0.0018366	0.000696423	0.00122403	0.000695409	0.00130083	0.00112661	2.32747e-10	0.000311645	0.00121439	1.92321e-10	0.000952431	2.70507e-10	0.00121965	2.02699e-10	0.000564806	0.00058553	1.87964e-10	0.000444313	0.00187122	0.000447102	2.58808e-10	0.000987486	0.00065799	0.00102501	0.000397098	0.000705521	0.00156991	2.9087e-10	2.46268e-10	3.544e-10	3.74856e-10	0.0012236	3.27053e-10	0.00126146	0.00144429	3.18323e-10	1.70644e-10	0.00170042	0.000275598
358	methionine 1	720.016	13.1243,0	62	176	0.000283635	0.000389288	0.000168808	0.000201527	2.29143e-10	1.96134e-10	3.47496e-10	0.000313995	0.000160886	0.000438498	0.00033408	2.32747e-10	0.00013707	1.93412e-10	1.92321e-10	0.000260954	0.000130331	0.000258249	0.00013612	0.000287138	0.000211719	8.2816e-05	0.000229686	0.000300802	0.000172591	0.000154491	2.05084e-10	0.000176701	0.000334843	0.00019477	0.000178633	4.29156e-10	0.000360483	2.46268e-10	0.000363688	0.000700531	0.000364406	0.000480324	0.000422493	0.000424997	3.18323e-10	1.70644e-10	0.00040136	0.000337173
359	oxoproline	902.193	13.2065,0	58	156	0.158923	0.0686865	0.0691032	0.0739595	2.29143e-10	0.0839346	0.0517405	0.0879613	0.0411547	0.0785647	0.0889987	0.178889	0.0610189	1.93412e-10	0.155976	0.0881862	0.119715	0.0934392	0.102966	0.110476	0.086196	0.103419	0.0509336	0.204859	0.0923208	0.0905435	2.05084e-10	2.86053e-10	0.0678823	0.0491016	0.081965	0.112598	0.123594	0.120993	0.0689002	3.74856e-10	0.110553	0.0984254	3.02577e-10	2.76025e-10	3.18323e-10	1.70644e-10	0.102096	0.0887215
366	unknown	244.071	13.328,0	63	81	0.0019233	0.00285242	0.00157208	0.000560606	0.00233962	0.00143587	0.00262245	2.29769e-10	0.000657836	0.00180182	3.36251e-10	2.32747e-10	0.000877477	0.00103604	0.00201697	0.000739916	0.000361256	0.00238269	2.02699e-10	1.77865e-10	0.00170575	1.87964e-10	0.0018284	2.22728e-10	0.00131797	0.00206402	0.0016412	0.00181994	0.00112882	0.00184727	0.00121779	0.00110623	0.00341414	0.00386394	0.00179791	0.00264452	1.79445e-10	0.00286115	0.00248731	0.0031365	3.18323e-10	1.70644e-10	0.00217021	0.00281464
369	Analyte 528	580.8	13.3811,0	54	292	0.0311126	0.0115473	0.0237611	0.0314639	0.0430606	0.0296253	0.0156281	0.0259706	0.0134623	0.0153915	0.0191052	0.044838	0.0285253	0.0297882	0.0339483	0.032367	0.0463	0.0152736	0.0324151	0.0328487	0.0149918	0.0355071	0.0350952	0.0303989	0.0272309	0.0307219	0.041841	0.0162795	0.020782	0.0321676	0.0280483	0.0122145	0.0296121	2.46268e-10	0.0192109	0.021713	0.019376	0.0151149	0.0194797	0.024027	0.0270981	0.0260041	0.0151363	0.0307377
374	pyrogallol	290.278	13.4245,0	38	254	1.73992e-10	0.000432933	2.33903e-10	0.00106814	2.29143e-10	0.000637672	3.47496e-10	0.000560398	0.000187227	0.000848998	3.36251e-10	0.00102698	0.0002871	1.93412e-10	1.92321e-10	2.51893e-10	2.70507e-10	9.6849e-05	2.02699e-10	0.000451929	0.000296104	0.000299349	2.15301e-10	2.22728e-10	2.39935e-10	0.00037813	2.05084e-10	0.000273913	1.90325e-10	2.14164e-10	0.000228191	0.000129718	2.9087e-10	2.46268e-10	3.544e-10	0.000499473	1.79445e-10	0.00025139	3.02577e-10	0.000299855	3.18323e-10	1.70644e-10	0.000230039	0.000114666
382	Threonic acid	844.559	13.5744,0	59	292	0.00954578	4.09074e-10	2.33903e-10	0.0096375	0.00882531	0.0112616	0.0214443	0.00859882	0.00510103	0.0263244	0.0143485	0.0158509	0.0107435	0.00793362	0.00838854	0.0117478	2.70507e-10	0.00298657	0.0099488	1.77865e-10	0.00399676	0.00814091	0.0151998	0.00554493	0.00915287	2.58808e-10	0.00776881	0.00435395	0.0101708	0.0144305	0.00871488	0.00324071	0.00740991	0.00606351	0.00684194	0.0124769	0.00704535	0.00609749	3.02577e-10	0.0086372	3.18323e-10	0.0069351	4.97681e-10	0.00733405
383	unknown	592.294	13.6257,0	36	219	0.000357142	0.000200527	0.000227834	0.000275733	0.000713549	1.96134e-10	3.47496e-10	2.29769e-10	0.000101722	3.52643e-10	0.000264077	0.000852852	0.000203867	1.93412e-10	1.92321e-10	0.000121897	2.70507e-10	0.000236081	0.000410171	0.000423933	0.000214657	0.000406614	0.000233924	2.22728e-10	0.000423418	0.000188853	2.05084e-10	0.000246381	1.90325e-10	0.000245316	0.000211618	0.000141078	7.53035e-05	0.000168645	0.000165935	3.74856e-10	1.79445e-10	0.000403846	3.02577e-10	0.000261628	3.18323e-10	0.000298596	0.000210187	2.27276e-10
387	2-hydroxy-2-phenylacetic acid	542.778	13.7111,0	36	164	8.4959e-05	6.7018e-05	2.33903e-10	5.03937e-05	9.87875e-05	1.96134e-10	7.48641e-05	0.000171064	3.69644e-10	3.52643e-10	3.36251e-10	2.32747e-10	6.42433e-05	3.08617e-05	1.92321e-10	4.00502e-05	4.86343e-05	4.73125e-05	0.000117953	6.35073e-05	2.17118e-10	1.87964e-10	2.15301e-10	9.14258e-05	7.35047e-05	2.58808e-10	3.73863e-05	2.86053e-10	0.000107086	8.54842e-05	4.51513e-05	4.29156e-10	4.51919e-05	2.46268e-10	3.544e-10	8.71845e-05	1.79445e-10	3.27053e-10	3.02577e-10	2.76025e-10	0.000143772	8.50614e-05	4.97681e-10	2.27276e-10
390	2-hydroxy-3-isopropylbutanedioic acid	456.646	13.7647,0	69	129	0.00810034	0.00336972	0.00611639	0.00315103	0.00877558	0.00440879	0.00376543	0.00553677	0.0030423	0.00360222	0.00616922	2.32747e-10	0.00325021	0.00158574	0.00799927	0.00431434	0.00476213	0.00522791	0.00549576	0.00577034	0.0133554	1.87964e-10	0.00463607	0.00405199	0.00543791	0.00684905	0.00190981	0.0144415	0.0060995	0.00482865	0.00520178	0.00217043	0.0101017	0.00562546	0.00355343	0.0080803	0.00563669	0.00329483	0.00345185	0.0114389	3.18323e-10	0.00512243	0.00395486	0.00364795
393	alpha-ketoglutaric acid	813.597	13.7902,0	62	89	1.73992e-10	0.00221935	0.00405615	0.00163547	0.0038646	0.00185552	0.00235681	0.00288513	0.00128032	0.00213963	3.36251e-10	2.32747e-10	0.0016743	0.000833041	0.00339295	0.0030534	0.00260416	0.00433657	0.00367695	0.00390646	2.17118e-10	1.87964e-10	0.00185529	0.00280224	0.00277608	2.58808e-10	0.00096721	2.86053e-10	0.0032251	0.00191133	0.00197693	0.000187715	2.9087e-10	0.00455984	0.00142158	0.00495825	0.00411678	0.00260496	0.00249215	0.00624275	3.18323e-10	0.00267274	0.00217551	0.00331525
395	Analyte 573	492.364	13.8074,0	51	103	1.73992e-10	0.00112415	0.00147543	0.000985359	2.29143e-10	0.0024469	0.00137199	0.00198223	0.000982986	0.00148372	0.0029137	2.32747e-10	0.000859515	1.93412e-10	0.00170752	0.00153673	2.70507e-10	0.00135523	2.02699e-10	0.00103394	2.17118e-10	1.87964e-10	0.00153019	0.00203379	0.00197806	2.58808e-10	0.000375397	2.86053e-10	1.90325e-10	0.00168322	0.000962002	0.000571562	2.9087e-10	2.46268e-10	0.00122799	0.00189948	0.00184858	0.00151191	0.00205614	0.00235759	3.18323e-10	0.00102643	0.00110026	0.00145627
401	unknown	434.98	13.9001,0	57	122	1.73992e-10	0.000355176	0.0010309	0.000556826	0.0011027	0.000289982	9.76132e-05	2.29769e-10	3.69644e-10	0.000251757	0.000643441	2.32747e-10	5.28187e-05	1.93412e-10	1.92321e-10	0.000533365	0.000362297	0.000825568	0.000605272	0.000688617	0.000564656	0.000666409	2.15301e-10	0.000152902	2.39935e-10	2.58808e-10	0.000359963	0.000613718	0.000549964	0.000250501	0.000351815	0.000255763	2.9087e-10	0.000568385	0.000130784	0.000553215	0.00030555	0.000362167	0.000237222	0.000171446	0.0011325	0.000400983	0.00164374	0.000440824
403	Analyte 585	392.25	13.9531,0	68	116	0.00509358	0.0135031	0.0143079	0.0178748	0.0139151	1.96134e-10	0.0128882	0.0121152	0.0188647	0.0151245	0.0123433	2.32747e-10	0.00862071	0.00766978	0.0134752	0.00618903	0.00791046	0.0133319	0.00594098	0.00725828	0.00838283	0.00716424	0.00695616	0.0105589	0.01015	0.0147372	0.00266384	0.00853758	0.0103165	0.00700568	0.00976333	0.00811261	0.0104643	0.00974371	0.0095088	0.0107294	0.00857317	0.0122531	0.016268	0.0139803	0.0136346	0.00856559	0.0157105	0.010968
410	Analyte 593	511.796	14.0375,0	64	103	0.000883822	0.0015152	2.33903e-10	0.000959246	0.00140628	1.96134e-10	3.47496e-10	0.00100599	0.00312157	0.000767942	0.000736672	2.32747e-10	0.000491586	0.00265761	0.00168682	0.000799097	0.000676944	0.00065342	0.00155137	0.00150208	0.000545067	0.00128568	0.00245175	0.000829922	0.00106681	0.00325003	0.00058929	0.000574157	0.001586	2.14164e-10	0.00108648	0.00087243	0.00125174	0.00199566	0.000938539	0.00151241	0.00104118	0.000941087	0.000850271	0.00126872	0.00399189	0.00175156	0.00213575	0.00113496
411	D-alanyl-D-alanine 2	222.305	14.0547,0	64	174	0.000208645	4.09074e-10	2.33903e-10	0.000275903	2.29143e-10	1.96134e-10	0.000272688	0.000519206	0.000417438	0.000327472	0.000269156	2.32747e-10	0.000302469	0.000892252	1.92321e-10	0.000225783	0.000431374	0.000294919	0.000917325	0.000743704	0.000318471	0.000731848	0.000593403	0.000855004	0.000624159	0.000353567	0.000514187	0.000393462	0.00057743	0.000647388	0.000390242	4.29156e-10	0.000177865	0.000352535	0.000141286	0.000315658	0.000440558	0.000136113	0.000262225	0.000230683	0.00196315	0.00062914	0.000278237	0.000395386
412	3-hydroxy-3-methylglutaric acid	896.853	14.0754,0	69	109	0.00104187	0.000752561	0.00177355	0.000587512	0.00146788	0.00246046	0.000874689	0.00071193	0.000512032	0.000997111	0.00111285	2.32747e-10	0.000534145	0.00237172	0.00181352	0.000438593	0.000807781	0.000641884	0.00158194	0.00166719	0.000800624	0.00130285	0.000849392	0.000824491	0.00121115	0.00224285	0.00103355	0.000900339	0.00125899	0.000845029	0.00111395	0.000824881	0.00140186	0.00141071	0.00080332	0.00111365	0.000829372	0.000866493	0.000630295	0.000925603	0.00215654	0.00123103	0.00099622	0.00111088
413	unknown	362.54	14.0862,0	50	188	0.000347104	0.000194377	2.33903e-10	3.33485e-10	0.00047973	0.000305916	0.000219068	0.000225273	0.000302376	0.000240795	0.00020869	2.32747e-10	0.000103602	0.000413255	0.00052051	0.000135312	0.0002129	0.000277303	2.02699e-10	1.77865e-10	2.17118e-10	1.87964e-10	2.15301e-10	0.0002742	0.00029155	2.58808e-10	2.05084e-10	2.86053e-10	0.000147293	2.14164e-10	0.000163308	4.42953e-05	0.000334755	0.000281643	0.000202902	3.74856e-10	0.000270016	3.27053e-10	0.000133301	0.000163894	0.000489815	0.000372127	4.97681e-10	0.00023431
422	hexadecane	269.652	14.1464,0	50	255	0.000938298	6.92689e-05	2.33903e-10	0.000198582	2.29143e-10	0.000419823	0.000132351	0.000226402	3.69644e-10	0.000104635	0.000125007	0.000692834	0.000164266	0.000527152	1.92321e-10	0.000211966	0.000635849	0.000172211	0.00114655	0.000691183	0.000286515	0.000866566	0.00022039	0.000437001	0.00108868	0.000201325	0.000397122	0.000351478	0.000352406	0.000225198	0.000362769	0.00188619	2.9087e-10	0.000193202	3.544e-10	3.74856e-10	0.000170855	0.000103602	3.02577e-10	0.000178578	3.18323e-10	1.70644e-10	4.97681e-10	2.27276e-10
431	Analyte 619	499.5	14.2414,0	54	215	0.000351641	0.000453455	0.000847834	0.000490751	0.00150957	0.00226955	0.000997649	0.00025547	0.00109165	0.00232191	0.000361448	2.32747e-10	0.000105872	0.000173606	1.92321e-10	0.00122494	0.000117962	0.000270501	0.00184343	0.000551945	0.000162998	1.87964e-10	2.15301e-10	0.000675785	0.000154068	0.00104518	2.05084e-10	0.000187068	0.00152457	2.14164e-10	0.000632962	1.26927e-05	2.9087e-10	0.00126492	0.000292364	0.000251055	0.000388648	0.000547552	0.00153625	0.000471584	3.18323e-10	0.000272869	0.000228813	0.00040796
432	2-mercaptoethanesulfonic acid 2	284.268	14.247,0	50	266	1.73992e-10	0.000122247	2.33903e-10	3.33485e-10	2.29143e-10	0.000167999	0.000119115	0.000205783	7.44143e-05	0.000102488	0.00017899	2.32747e-10	9.63739e-05	0.000169316	1.92321e-10	2.51893e-10	0.000177019	0.000645204	2.02699e-10	0.000115917	0.000387977	1.87964e-10	0.000151369	0.000330812	0.000343245	0.000188623	2.05084e-10	0.00060804	0.000221393	0.000192674	0.0001533	4.29156e-10	0.000229106	2.46268e-10	0.000144049	0.000117677	0.00026829	0.000126779	0.000112173	0.000138256	3.18323e-10	0.000198179	4.97681e-10	0.000630063
433	unknown	373.965	14.2605,0	66	146	0.000823778	0.000727426	0.000656278	0.000329918	0.00152023	0.000681054	0.000185118	0.00068205	0.000232408	0.00081493	0.000512289	2.32747e-10	0.0002622	0.000885929	0.000276586	0.000246696	0.000345807	0.000287223	0.000425833	0.000395885	0.000339718	0.00017208	0.000467212	0.00041418	0.000394847	0.000584075	2.05084e-10	0.000327001	0.000380184	0.000457982	0.000460964	4.29156e-10	0.000608719	0.000872317	0.000449652	0.000859308	0.00071382	0.000285935	0.000587132	0.000446813	3.18323e-10	1.70644e-10	0.000894468	0.00038515
436	Analyte 624	444.5	14.3112,0	68	69	0.003405	0.00277626	0.00335226	0.00184083	0.00718414	0.00456028	0.00286517	0.00200179	0.00221174	0.00244148	0.00363395	0.0085731	0.00129453	0.00505119	0.00547367	0.00149662	0.00203481	0.00301813	0.00278242	0.00455793	0.0021549	0.002139	0.00404277	0.00298524	0.005279	0.0042104	2.05084e-10	0.00256099	0.00365898	0.00398553	0.00338574	0.00382265	0.00400293	0.00357643	0.00294229	0.00362077	1.79445e-10	0.00343121	0.00264741	0.00396397	0.0101471	1.70644e-10	0.00357905	0.00364816
444	Analyte 637	271	14.4258,0	37	355	1.73992e-10	1.92114e-05	2.33903e-10	3.33485e-10	2.29143e-10	1.87049e-05	3.47496e-10	2.29769e-10	3.69644e-10	3.43302e-05	3.36251e-10	2.32747e-10	1.1637e-05	1.93412e-10	1.92321e-10	2.51893e-10	6.75401e-05	4.54543e-06	2.02699e-10	7.75393e-06	2.17118e-10	1.87964e-10	7.81434e-06	9.38913e-06	2.39935e-10	0.000106546	2.05084e-10	2.86053e-10	3.35614e-05	2.14164e-10	1.07013e-05	5.61648e-06	2.9087e-10	2.74851e-06	1.11474e-05	3.74856e-10	1.79445e-10	3.27053e-10	2.70122e-06	2.0727e-05	3.18323e-10	1.70644e-10	4.97681e-10	2.27276e-10
446	4-Hydroxybenzoic acid	799.565	14.4454,0	63	267	0.000689372	0.000470644	2.33903e-10	0.000281763	0.00100359	0.00104733	0.000608132	0.000543398	0.000273164	0.000333315	0.000624664	2.32747e-10	0.000211862	0.00112063	0.000373298	0.000626659	0.000321608	4.67462e-10	0.000631525	0.000380717	0.000398314	0.000320481	0.000316581	0.000537348	0.00138322	0.000829288	2.05084e-10	0.000564018	0.000828159	0.000394598	0.000503789	0.000900917	0.000407639	0.000515559	0.000345196	3.74856e-10	0.00113491	0.000343688	0.000279896	2.76025e-10	0.00147541	0.000762757	0.000591425	0.000816777
452	4-hydroxyphenylacetic acid	749.25	14.5578,0	61	179	1.73992e-10	0.00211598	2.33903e-10	0.00151024	0.00627278	0.00266493	0.0072217	0.00800907	0.00185286	0.00194344	0.0024513	2.32747e-10	0.00678846	0.00329298	0.00411021	0.00674884	0.00186151	0.00376834	2.02699e-10	0.00576852	0.0016995	0.00367625	0.00262417	0.00310302	2.39935e-10	0.000847331	0.00377127	0.00182587	0.0020647	0.00258455	0.00295259	0.00128601	0.00257374	2.46268e-10	0.00152941	0.00416031	0.0025256	0.00213037	0.00233706	0.0021639	3.18323e-10	0.0022663	0.00335344	2.27276e-10
454	unknown	381.034	14.5826,0	60	245	0.000735226	0.000547579	2.33903e-10	0.00035912	2.29143e-10	1.96134e-10	3.47496e-10	0.000721688	0.000387737	0.000208942	0.00033863	2.32747e-10	0.000310324	0.00074972	0.000798612	2.51893e-10	0.000316594	4.67462e-10	0.000930934	0.00035776	0.000218444	0.000553006	0.00089447	0.000631012	2.39935e-10	0.000524004	0.000929294	0.000235474	0.00121564	0.000900259	0.000428816	0.000145447	0.000713449	0.000800337	0.000203655	0.000678513	0.000535672	0.000326066	0.000440222	0.000279958	3.18323e-10	0.0005117	0.000402206	0.000773256
457	unknown	412.511	14.6141,0	51	175	1.73992e-10	0.00082991	0.0018019	0.000893194	2.29143e-10	0.000131394	0.000755182	2.29769e-10	3.69644e-10	0.000636083	0.00110558	2.32747e-10	2.50734e-10	1.93412e-10	1.92321e-10	2.51893e-10	0.000909166	0.00094349	0.000959564	1.77865e-10	0.000620247	0.00110236	0.000800997	2.22728e-10	2.39935e-10	0.0019996	2.05084e-10	0.000639658	0.000897028	0.000792768	0.000527271	4.29156e-10	0.00110291	0.00139311	0.00162726	0.00113803	0.000841441	0.000995729	0.000746233	0.00133634	3.18323e-10	1.70644e-10	0.00108105	0.00165948
467	unknown	412.667	14.7813,0	67	245	0.00174376	0.00135154	0.00213138	0.00127599	0.00266457	0.00375292	0.0011639	0.00230482	0.000975147	0.00102349	0.00144777	2.32747e-10	0.00248966	0.0026323	0.00253297	0.00232397	0.00138801	0.00084713	0.00428156	0.002047	0.00118403	0.00199964	0.00243511	0.00155775	2.39935e-10	0.00239637	2.05084e-10	0.00118604	0.00279934	0.00238116	0.00181058	0.000856376	0.00216502	0.00211142	0.000848503	0.00173643	0.00124169	0.00116821	0.00131451	0.00117898	3.18323e-10	0.00223253	0.00123919	0.00201673
469	Analyte 672	221.143	14.8287,0	45	239	1.4397e-05	1.60659e-05	1.9934e-05	3.33485e-10	3.27959e-05	1.96134e-10	2.18416e-05	2.29769e-10	4.05105e-05	3.52643e-10	3.40177e-05	2.32747e-10	1.11446e-05	2.32457e-05	4.21596e-05	4.80387e-05	1.67951e-05	2.32405e-05	4.28843e-05	2.60873e-05	2.17118e-10	1.87964e-10	2.15301e-10	2.27073e-05	2.39935e-10	2.58808e-10	2.05084e-10	2.86053e-10	1.90325e-10	2.47468e-05	1.53539e-05	4.01527e-05	2.9087e-10	3.42855e-05	1.94682e-05	3.01923e-05	1.79445e-10	3.27053e-10	1.8464e-05	2.43858e-05	7.57525e-05	3.08513e-05	3.58809e-05	2.27276e-10
470	Analyte 673	158.636	14.8388,0	45	156	0.000180048	9.54232e-05	0.000109814	3.33485e-10	0.000291437	0.000159782	0.000129184	2.29769e-10	0.000176255	0.000249019	0.000424279	2.32747e-10	9.49728e-05	0.000108809	1.92321e-10	0.000268305	9.05693e-05	0.000191317	2.02699e-10	0.000155249	0.000188482	8.44333e-05	2.15301e-10	2.22728e-10	2.39935e-10	2.58808e-10	2.05084e-10	0.000189069	0.000140947	2.14164e-10	0.000110913	4.29156e-10	0.000121353	2.46268e-10	0.000137872	0.000338097	0.000187746	0.000233925	0.000118881	0.000171736	3.18323e-10	1.70644e-10	4.97681e-10	2.27276e-10
473	Analyte 676	368	14.8936,0	68	173	0.00382415	0.00142003	0.00261134	0.00448775	0.00274807	0.0021822	0.0018387	2.29769e-10	0.00160857	0.00167947	0.00297918	0.00270139	0.00426241	0.00438846	0.00348014	0.00401595	0.00205804	0.00179987	2.02699e-10	0.00197436	0.00154251	0.00366494	0.00196595	0.00173447	2.39935e-10	0.00366738	0.00368323	0.00161818	0.00167235	0.00196357	0.00238576	0.00106632	0.00207033	0.00400494	0.0021258	0.00376875	0.0024427	0.0023177	0.0024592	0.00302337	3.18323e-10	0.00501572	0.00232608	0.00296716
474	ribose	889.507	14.9161,0	69	217	0.0035368	0.00170263	0.00277864	0.00643163	0.00294344	0.00300946	0.00170344	2.29769e-10	0.00124111	0.00182149	0.002977	0.00247474	0.00544802	0.00338009	0.0037323	0.00438393	0.00284396	0.00233904	2.02699e-10	0.0032527	0.00190984	0.00308546	0.00211664	0.00217698	2.39935e-10	0.00390319	0.00394846	0.00197374	0.00226921	0.00210072	0.00264949	0.00143727	0.00248486	0.00388108	0.00233535	0.00342784	0.00260305	0.00243992	0.00216899	0.0034501	3.18323e-10	1.70644e-10	0.00229393	0.0038465
475	unknown	262.053	14.9336,0	37	320	8.32399e-05	4.09074e-10	2.33903e-10	3.33485e-10	9.37613e-05	4.0269e-05	3.47496e-10	2.29769e-10	3.97805e-05	3.52643e-10	6.54186e-05	2.32747e-10	2.50734e-10	0.000141538	1.92321e-10	5.60797e-05	2.70507e-10	4.67462e-10	2.02699e-10	4.82088e-05	2.17118e-10	6.60293e-05	0.000135298	5.26287e-05	0.000167609	2.58808e-10	2.05084e-10	2.86053e-10	1.90325e-10	2.14164e-10	3.29955e-05	4.29156e-10	7.25607e-05	0.00016568	3.544e-10	6.25589e-05	6.23328e-05	6.51889e-05	8.83445e-05	4.96564e-05	3.18323e-10	8.43817e-05	4.97681e-10	2.27276e-10
478	Ribonic acid, gamma-lactone	639.177	15.0069,0	64	217	0.000280074	0.000245162	0.000609809	3.33485e-10	1.76197e-05	0.000705178	0.000385647	2.29769e-10	0.000260839	0.000494656	0.000387954	2.32747e-10	0.000577069	0.000316621	1.92321e-10	0.000834033	0.000463275	0.000400432	2.02699e-10	0.000459203	0.00027973	0.000334306	0.000452219	0.000411487	2.39935e-10	0.000704827	0.000939589	0.000292832	0.000523241	0.00045129	0.000360903	0.000252203	0.000504596	0.000415152	0.00044867	0.000480577	1.79445e-10	0.000382456	0.000308273	0.000501315	0.00154163	0.000520474	0.000399244	0.001207
482	Analyte 689	366.341	15.0608,0	59	159	0.0001233	0.000230876	0.000101945	3.33485e-10	2.29143e-10	0.00076187	4.16489e-05	2.29769e-10	3.69644e-10	0.000354644	0.000142584	2.32747e-10	0.000231686	0.00100232	0.000923693	0.000510827	0.000389064	0.000345804	2.02699e-10	1.77865e-10	2.17118e-10	0.000113293	0.000306576	2.22728e-10	2.39935e-10	0.000109384	2.05084e-10	0.000223181	0.000575592	2.14164e-10	0.000216276	0.000299407	0.000301351	0.0004672	0.000548377	0.000556692	0.000265022	0.000349637	3.02577e-10	0.000739392	3.18323e-10	0.000506876	0.000343984	0.000303825
485	unknown	419.623	15.1123,0	54	218	0.000499692	0.000577449	0.000737468	3.33485e-10	2.29143e-10	0.00129484	0.000520355	2.29769e-10	0.000626869	0.000573058	0.000810621	0.000999313	0.000798416	0.00146594	1.92321e-10	0.000954493	0.00121306	0.000549686	0.00169703	0.000756042	0.000520487	0.000365301	0.000610649	0.000386413	2.39935e-10	0.000783812	2.05084e-10	0.000507099	0.000892322	0.000595129	0.000624518	0.000658163	0.00074062	0.00109988	0.00071549	3.74856e-10	0.000736295	0.0007138	0.000541179	0.000989099	3.18323e-10	0.00136067	0.000594241	2.27276e-10
495	unknown	691.179	15.1811,0	28	42	0.00101611	0.00106464	2.33903e-10	0.00216276	0.00297277	0.00137209	0.000817298	2.29769e-10	0.000604228	0.00119913	0.000711822	0.00205271	0.00100868	0.00123986	0.00136056	0.00127648	0.00282863	0.000435871	2.02699e-10	0.000543472	0.000786009	0.0011785	2.15301e-10	2.22728e-10	2.39935e-10	2.58808e-10	2.05084e-10	2.86053e-10	1.90325e-10	2.14164e-10	0.000821054	4.29156e-10	2.9087e-10	2.46268e-10	3.544e-10	3.74856e-10	1.79445e-10	3.27053e-10	3.02577e-10	2.76025e-10	3.18323e-10	1.70644e-10	4.97681e-10	2.27276e-10
498	N-formyl-L-methionine 2	381.254	15.2069,0	68	175	0.00253688	0.00247616	0.00360803	0.0107023	0.00900672	0.00434421	0.00217103	2.29769e-10	0.00168289	0.00236018	0.00320803	0.00493237	0.0052446	0.00573949	0.00578722	0.00505466	0.00868896	0.00249268	2.02699e-10	0.00431386	0.00274497	0.00333243	0.00410851	0.00307938	2.39935e-10	0.00423467	2.05084e-10	0.00273044	0.00321214	0.00398211	0.00372583	4.29156e-10	0.00325864	0.00461982	0.00258693	0.00580664	0.00289701	0.00351259	0.00329888	0.00441643	3.18323e-10	0.00448382	0.0039791	0.00422006
505	Methoxamedrine 2	137.793	15.3255,0	32	94	1.73992e-10	4.09074e-10	0.000483781	0.00101501	0.00117477	1.96134e-10	3.47496e-10	2.29769e-10	3.69644e-10	3.52643e-10	3.36251e-10	2.32747e-10	2.50734e-10	0.000577149	0.000432777	2.51893e-10	2.70507e-10	0.00034176	2.02699e-10	0.000243902	2.17118e-10	0.000266271	2.15301e-10	0.000218582	2.39935e-10	0.000557876	0.000906316	2.86053e-10	1.90325e-10	2.14164e-10	0.000207273	4.29156e-10	2.9087e-10	2.46268e-10	3.544e-10	0.000426868	0.000166621	0.000205646	0.000173354	2.76025e-10	3.18323e-10	0.000338582	0.000660294	0.000430987
507	6-deoxy-D-glucose 1	368.362	15.352,0	69	276	0.00169204	0.00114435	0.000984342	0.000664603	2.29143e-10	0.00165835	0.000586367	2.29769e-10	0.000558637	0.000253091	0.000771741	0.00170934	0.00176001	0.00197708	0.0012959	0.00132615	0.00398206	0.000307987	0.00148111	0.000227532	0.000702191	0.000670521	0.00069616	0.000556318	2.39935e-10	0.000793323	0.0024807	0.000486049	0.000610747	0.000490422	0.000995571	0.000527283	0.00148995	0.00123167	0.000359303	0.000721864	0.000539913	0.000315732	0.000582105	0.000392878	0.00212856	0.000729787	0.00118501	0.0027272
509	D-Arabitol	942.262	15.392,0	62	217	0.0617197	0.0735165	0.0317019	0.102439	0.0535644	0.043121	0.031179	0.077014	0.0928729	0.0247188	0.0309992	0.0566639	0.0404889	0.0427555	0.0343062	2.51893e-10	0.0548076	0.0237214	2.02699e-10	0.0468026	0.0208491	0.0620949	0.0399294	0.0328959	2.39935e-10	0.0396605	0.0719884	0.0227181	0.0346122	0.0380481	0.0428396	0.0160816	0.0361666	0.0467389	0.0228503	0.0586215	1.79445e-10	0.0224583	3.02577e-10	0.040403	0.0925419	0.0535594	0.0402929	0.0409712
515	3-(3-hydroxyphenyl)propionic acid	668.527	15.5486,0	55	192	5.72978e-05	5.32101e-05	9.34458e-05	3.33485e-10	0.000603902	0.000257149	0.000233471	0.000427782	8.68748e-10	0.000154412	0.000124952	2.32747e-10	0.000175066	0.000509452	1.92321e-10	0.000771499	8.8995e-05	0.000173982	2.02699e-10	7.57355e-05	2.17118e-10	3.57637e-05	0.000118805	0.000125173	0.000221128	2.58808e-10	0.000765705	0.000170563	0.000212985	0.000124092	0.000185819	7.88564e-05	1.76873e-05	2.46268e-10	0.000147164	3.74856e-10	1.79445e-10	3.27053e-10	0.000250716	2.76025e-10	0.000558936	0.000658157	6.87791e-05	6.9689e-05
517	quinolinic acid	770.211	15.5733,0	59	194	0.000342974	0.000277593	0.000532525	0.00234001	0.00165298	0.000695766	0.000402358	2.29769e-10	0.000183601	0.000339515	0.000577457	2.32747e-10	0.000675353	0.00104259	0.00114628	0.000596311	0.00107138	0.000391536	2.02699e-10	0.000983622	0.00080495	1.87964e-10	0.000847206	0.000662253	2.39935e-10	2.58808e-10	2.05084e-10	0.000757011	0.000112888	0.00077637	0.000573751	0.00020265	0.000300693	0.000407531	0.000205763	0.000398305	0.00056341	0.000503346	0.000437987	0.000592619	3.18323e-10	0.000593818	0.000430912	0.000623511
519	fucose 2	912.779	15.593,0	69	117	0.00544051	0.00302215	0.00602337	0.0192528	2.29143e-10	0.00548891	0.00805054	2.29769e-10	0.00347575	0.00566627	0.00626459	0.00998862	0.00648568	0.00759697	0.012184	0.00388492	0.0154569	0.00566843	2.02699e-10	0.00819294	0.00510214	0.00457846	0.00619202	0.00731053	2.39935e-10	0.00733975	0.0118132	0.0052232	0.00422482	0.00618143	0.00633697	0.00243991	0.00641434	0.0100367	0.0056727	0.00584603	0.00553504	0.00720856	0.00628403	0.00541273	3.18323e-10	0.00636607	0.00759609	0.004691
522	Ciliatine	216.432	15.6304,0	39	228	3.866e-05	4.09074e-10	2.33903e-10	3.33485e-10	2.29143e-10	3.28061e-05	1.97311e-05	2.29769e-10	1.64838e-05	2.30201e-05	3.36251e-10	2.32747e-10	2.50734e-10	1.93412e-10	5.85491e-05	2.51893e-10	5.54005e-05	1.31183e-05	2.02699e-10	1.77865e-10	3.1961e-05	1.33154e-05	2.15301e-10	1.74128e-05	2.39935e-10	2.32321e-05	2.05084e-10	3.4137e-05	2.50873e-05	2.14164e-10	1.34306e-05	4.29156e-10	3.489e-05	2.89889e-05	3.544e-10	2.90026e-05	2.17737e-05	3.27309e-05	4.21176e-05	3.16418e-05	3.18323e-10	3.53326e-05	2.53707e-05	2.27276e-10
530	Aconitic Acid	947.509	15.7311,0	57	147	0.0339071	0.0122039	0.0275992	0.073717	2.29143e-10	0.0242311	0.0133263	2.29769e-10	0.0129217	0.0181039	0.0244693	2.32747e-10	0.0169475	0.0354867	0.0398022	2.51893e-10	0.0294832	0.0148476	2.02699e-10	0.0284904	0.0177791	1.87964e-10	0.0195667	0.0145187	2.39935e-10	0.0302239	2.05084e-10	0.0153303	0.0140869	2.14164e-10	0.0172348	0.00500098	0.0236243	0.0294458	0.0166203	0.0218487	1.79445e-10	0.0118816	0.0187377	0.0234731	3.18323e-10	0.0259928	0.0106915	0.0267395
537	Diglycerol 1	663.304	15.8639,0	58	292	0.00157381	0.000905189	0.00155064	3.33485e-10	2.29143e-10	0.00187367	0.00112692	2.29769e-10	0.00140885	3.52643e-10	0.0010156	0.00184879	0.00355809	0.00283904	0.00184562	0.00107735	0.00407449	0.000945823	2.02699e-10	0.00226563	0.00184097	0.00251478	0.00314169	0.00137227	2.39935e-10	0.00179958	0.00443489	2.86053e-10	0.00148906	0.00304556	0.00158494	0.0008232	0.00168328	0.00203435	0.000818424	0.0015081	0.00112131	0.000944454	3.02577e-10	2.76025e-10	3.18323e-10	0.00134907	0.00104263	2.27276e-10
551	2-deoxy-D-glucose 1	606.283	16.0405,0	61	103	1.73992e-10	0.0163494	0.042066	0.0870123	0.0629971	1.96134e-10	0.0188851	2.29769e-10	0.0246127	0.0627145	0.0165807	0.0294645	0.0359828	0.0254895	0.030756	0.0598847	2.70507e-10	0.0126483	2.02699e-10	0.0187932	0.0155037	1.87964e-10	2.15301e-10	0.0272562	2.39935e-10	0.0490326	0.0357272	0.0160545	0.0250276	0.0318922	0.0248244	4.29156e-10	2.9087e-10	0.031794	0.023638	0.0292433	0.0208483	0.0163196	0.0414703	0.028162	3.18323e-10	0.0232503	0.019288	0.0322293
554	O-Phosphorylethanolamine	665.533	16.0992,0	61	299	7.0005e-05	4.09074e-10	2.33903e-10	3.33485e-10	2.29143e-10	1.96134e-10	0.000247889	2.29769e-10	3.96288e-05	0.000169583	0.00012419	4.81519e-05	0.000587589	1.93412e-10	1.92321e-10	2.51893e-10	0.000285664	0.000328381	2.02699e-10	0.00034444	0.000256832	0.000428894	0.000332412	0.000246576	0.000225535	0.000215475	0.0001256	0.000274694	0.00013343	0.000309043	0.000159801	0.000239967	0.000203783	0.000365357	1.54715e-05	0.000255878	0.000258665	0.000173427	0.000265728	0.000345328	0.000540029	1.70644e-10	0.000179393	2.27276e-10
561	azelaic acid	799.241	16.2649,0	29	55	1.73992e-10	0.00173081	0.00305282	0.00484139	0.00129844	0.00444249	0.0055254	2.29769e-10	0.00103264	0.000723852	0.000782959	0.00521416	0.00226087	0.00122337	0.00118708	0.00110219	2.70507e-10	0.00178645	0.00192787	0.000609906	0.00293132	1.87964e-10	2.15301e-10	2.22728e-10	2.39935e-10	2.58808e-10	2.05084e-10	2.86053e-10	1.90325e-10	2.14164e-10	0.00138913	4.29156e-10	2.9087e-10	2.46268e-10	3.544e-10	3.74856e-10	1.79445e-10	3.27053e-10	3.02577e-10	2.76025e-10	3.18323e-10	1.70644e-10	4.97681e-10	2.27276e-10
569	Analyte 827	457.167	16.3963,0	30	82	0.0101734	0.00310225	0.0118828	0.0175444	0.0228753	0.00753641	0.00443997	0.0210745	0.00686048	0.0156702	0.00405125	0.00606225	0.00350347	0.0060793	0.00840711	0.0126703	0.0094158	0.00273856	0.016858	1.77865e-10	2.17118e-10	1.87964e-10	0.00982889	0.00597713	2.39935e-10	2.58808e-10	2.05084e-10	0.0041733	1.90325e-10	2.14164e-10	0.00703084	4.29156e-10	2.9087e-10	2.46268e-10	3.544e-10	3.74856e-10	1.79445e-10	3.27053e-10	3.02577e-10	2.76025e-10	3.18323e-10	1.70644e-10	4.97681e-10	2.27276e-10
574	isocitric acid 1	620.649	16.51,0	58	245	1.73992e-10	0.00739941	2.33903e-10	3.33485e-10	2.29143e-10	0.006046	3.47496e-10	2.29769e-10	0.00621209	0.0087651	0.00810733	0.00670556	0.00520785	0.00560677	0.00734954	0.00596749	0.00830666	0.0070941	0.0087599	0.00564994	0.00480643	1.87964e-10	2.15301e-10	0.00564398	0.00762904	0.00613907	0.00724947	0.00573103	0.0055095	0.00481113	0.00482325	4.29156e-10	0.00827808	0.0053654	0.00833872	0.00967982	0.00430778	0.0097346	0.00653307	0.00748174	3.18323e-10	0.0045804	0.00783233	0.00707044
588	beta-Mannosylglycerate 2	558.452	16.716,0	64	117	0.00297747	0.00174474	0.00326242	0.00625018	0.00178911	0.00412718	3.47496e-10	0.00915337	0.00217827	0.00136663	3.36251e-10	0.00283213	0.00172041	1.93412e-10	1.92321e-10	0.00247232	0.00712631	0.00144766	0.00803679	0.00300374	2.17118e-10	0.00388204	0.00230978	0.00286714	0.0101156	0.0038129	2.05084e-10	0.0018089	0.0026748	0.00858096	0.00318469	0.000633257	0.00188962	0.00336567	0.0020189	0.00300363	1.79445e-10	0.00173461	0.00185377	0.00244565	0.0148675	0.00493598	0.0022694	2.27276e-10
592	glycocyamine 3	302.516	16.7806,0	33	295	3.74183e-05	4.44982e-05	2.33903e-10	3.33485e-10	2.29143e-10	1.96134e-10	3.47496e-10	2.29769e-10	3.69644e-10	5.25434e-05	7.05797e-05	2.32747e-10	2.50734e-10	1.93412e-10	1.92321e-10	2.45927e-05	2.70507e-10	6.30974e-05	2.02699e-10	1.77865e-10	4.6534e-05	1.87964e-10	1.77029e-05	5.03357e-05	2.39935e-10	2.58808e-10	2.05084e-10	6.06406e-05	4.69332e-05	2.14164e-10	1.71627e-05	3.67568e-05	2.9087e-10	3.22361e-05	5.37762e-05	3.22451e-05	1.79445e-10	2.86396e-05	4.78517e-05	4.8651e-05	3.18323e-10	1.70644e-10	4.61546e-05	5.19729e-05
593	4-aminobenzoic acid	353.509	16.7893,0	58	267	0.00107444	0.000692864	0.00241032	0.00790305	2.29143e-10	0.00420613	3.47496e-10	2.29769e-10	0.000227743	3.52643e-10	3.36251e-10	2.32747e-10	0.003514	0.00590762	1.59628e-06	0.000234336	2.70507e-10	0.00173979	3.16395e-05	0.0016069	2.17118e-10	1.87964e-10	0.00108409	0.0013145	0.000896175	0.00238778	2.05084e-10	0.00273052	0.00244631	0.00286564	0.00144252	0.000333497	2.9087e-10	0.000621602	0.00171593	4.74615e-05	0.00382548	0.00031912	0.00215352	0.00177763	0.012754	0.00365306	0.00066458	0.000347978
600	unknown	508.621	16.8751,0	59	245	0.00228565	0.00114124	2.33903e-10	3.33485e-10	0.00114017	0.00603882	0.00062316	0.00359107	0.00181603	0.00143714	3.36251e-10	0.00257475	0.000524739	0.00146224	4.48389e-05	0.0031355	0.00343182	0.000255055	2.02699e-10	0.000557961	0.000684907	0.00370986	0.00670429	2.22728e-10	0.00191071	0.00144322	2.05084e-10	0.000731467	0.00442191	0.00183853	0.00171684	4.29156e-10	0.00165967	0.0050265	0.0007597	0.00163658	0.00108747	0.00153742	0.00248009	2.76025e-10	3.18323e-10	0.000428607	0.00229623	0.00195094
604	fructose 1	889.755	16.9386,0	53	262	8.89442e-05	0.000183127	0.000170004	0.00030452	2.29143e-10	1.96134e-10	3.47496e-10	0.00013435	0.000828635	0.000199187	0.000272629	0.000293134	6.35821e-05	2.90193e-05	0.000619324	2.51893e-10	0.000237413	5.85649e-05	0.0011077	6.25726e-05	0.000117923	0.000542745	2.15301e-10	0.000274592	0.000186926	2.58808e-10	0.000240702	0.000138662	1.90325e-10	0.00105209	0.000240212	4.29156e-10	2.9087e-10	2.46268e-10	3.544e-10	0.000130669	4.71573e-05	0.000169281	3.02577e-10	2.76025e-10	3.18323e-10	0.000108366	0.000206878	0.000761104
610	3,4-Dihydroxyphenylglycol	558	17.0361,0	44	355	1.73992e-10	5.58157e-05	0.000501147	0.000393313	2.29143e-10	0.000462569	9.62427e-05	2.29769e-10	3.69644e-10	3.52643e-10	0.000128098	0.00034661	2.50734e-10	1.93412e-10	1.92321e-10	2.51893e-10	0.000254519	0.000157292	2.02699e-10	0.000145321	0.000117025	1.87964e-10	2.15301e-10	6.94883e-05	0.000143392	0.000483518	2.05084e-10	0.000130965	0.000257804	2.14164e-10	0.000124771	4.29156e-10	0.000309709	2.46268e-10	0.000108526	0.000121148	1.79445e-10	3.27053e-10	0.00014114	8.86994e-05	3.18323e-10	1.70644e-10	0.000200991	0.000211435
618	D-Altrose 1	599.333	17.1239,0	33	274	0.000368753	0.000329668	2.33903e-10	0.00100954	0.000467612	0.00185316	3.47496e-10	2.29769e-10	0.000246825	0.000675705	0.000887267	2.32747e-10	0.00131316	1.93412e-10	1.92321e-10	0.000904554	0.00146959	0.000351321	2.02699e-10	0.00107333	0.000330203	0.00162214	0.000654923	2.22728e-10	2.39935e-10	0.00100241	2.05084e-10	0.000385933	0.00105685	0.000978927	0.000566062	4.29156e-10	2.9087e-10	2.46268e-10	3.544e-10	0.00117951	1.79445e-10	3.27053e-10	0.000208897	2.76025e-10	3.18323e-10	1.70644e-10	4.97681e-10	2.27276e-10
634	mannose 2	407.59	17.3004,0	39	179	0.00199182	0.00373594	2.33903e-10	3.33485e-10	2.29143e-10	0.0033687	0.00332042	2.29769e-10	0.00178218	3.52643e-10	3.36251e-10	2.32747e-10	2.50734e-10	1.93412e-10	1.92321e-10	2.51893e-10	2.70507e-10	0.00305991	2.02699e-10	1.77865e-10	0.00122842	1.87964e-10	0.000455412	0.00215082	2.39935e-10	0.00181098	2.05084e-10	0.00123474	0.00179197	0.000922742	0.000895135	0.00225352	2.9087e-10	2.46268e-10	0.00165546	0.0052079	1.79445e-10	0.00293058	0.00238118	0.00238203	3.18323e-10	0.00185965	4.97681e-10	0.00373253
643	glucose 2	926.508	17.4344,0	60	160	1.73992e-10	0.00320588	2.33903e-10	0.003842	2.29143e-10	0.00438201	0.00255541	0.00334075	0.00166346	0.00207716	0.00338086	0.00348057	0.00229521	1.93412e-10	0.00793476	0.00264142	0.00414772	0.00448538	0.00538376	0.00508217	0.00183387	0.00293881	0.00240869	0.00284968	0.00513416	2.58808e-10	2.05084e-10	0.00290199	0.0025529	0.00297187	0.00278302	0.000987683	2.9087e-10	0.00763432	0.00349593	0.00385155	0.00296573	0.00143279	0.00333483	2.76025e-10	0.00962987	0.00428446	0.00403036	0.00452008
647	tyramine	702.08	17.4788,0	25	174	0.00151968	0.000875149	0.00135167	0.000979089	0.00150172	0.0019121	0.000802754	2.29769e-10	0.000325061	3.52643e-10	0.00115073	0.00265817	0.000699222	1.93412e-10	1.92321e-10	2.51893e-10	2.70507e-10	0.000927476	0.000716142	1.77865e-10	2.17118e-10	0.000623223	2.15301e-10	0.000854116	0.00137701	0.00137077	2.05084e-10	2.86053e-10	1.90325e-10	2.14164e-10	0.000654803	4.29156e-10	2.9087e-10	2.46268e-10	3.544e-10	3.74856e-10	1.79445e-10	3.27053e-10	3.02577e-10	2.76025e-10	3.18323e-10	1.70644e-10	4.97681e-10	2.27276e-10
649	histidine 2	285.864	17.5349,0	46	287	0.000242204	4.09074e-10	2.33903e-10	0.000263985	2.29143e-10	1.96134e-10	3.47496e-10	1.81988e-06	3.69644e-10	3.52643e-10	0.000136657	0.000287821	7.07139e-05	1.93412e-10	0.000359156	0.000292406	1.03981e-06	4.67462e-10	0.000164021	0.000188976	2.17118e-10	0.000313702	0.000134149	8.63052e-05	0.000155937	0.000289645	2.05084e-10	8.36583e-05	0.000134237	0.000156974	0.000112114	1.56003e-06	2.9087e-10	4.85354e-05	3.544e-10	0.00016435	0.000105759	3.27053e-10	8.69244e-05	0.000129169	3.18323e-10	0.000206552	0.000130815	2.27276e-10
658	D-galacturonic acid 1	828.482	17.6299,0	57	333	0.0256945	0.00691839	0.018209	3.33485e-10	0.0150032	0.0189493	0.00775434	0.0093063	0.00610364	0.00503319	3.36251e-10	2.32747e-10	0.0102457	1.93412e-10	0.0253617	0.0134635	0.0305867	0.00602298	0.0218935	0.0195044	2.17118e-10	0.0242767	2.15301e-10	0.0149644	0.0260845	0.0237131	0.038944	2.86053e-10	0.01482	0.022136	0.0134996	0.0101845	0.0258872	0.0123513	0.00945581	3.74856e-10	0.0102065	0.00714683	0.0187075	0.00999016	3.18323e-10	0.019263	4.97681e-10	0.0129456
666	Gallic acid	298.4	17.748,0	61	179	0.000281721	0.000484117	0.000191999	3.33485e-10	0.00258887	0.000719948	0.000656205	0.000716964	3.69644e-10	3.52643e-10	3.36251e-10	2.32747e-10	2.50734e-10	1.93412e-10	0.000620561	2.51893e-10	0.000107781	0.00122847	0.00151105	0.000431857	0.000229658	0.0014435	2.15301e-10	2.22728e-10	0.000143937	0.00208054	2.05084e-10	0.000271883	0.000597045	2.14164e-10	0.000476871	0.00211563	0.00170632	0.000289215	0.00158791	3.74856e-10	0.000923267	0.00292322	0.000417474	0.00030059	3.18323e-10	1.70644e-10	0.00033031	0.000207001
668	D-galacturonic acid 1	800.885	17.7803,0	62	333	0.00398386	0.000919438	0.000626813	0.00163881	0.00281893	1.96134e-10	0.000798701	0.00224505	0.000620848	0.0012162	0.00162963	0.00168635	0.00214124	0.0045356	0.00303085	2.51893e-10	0.00278292	0.000869181	0.00276282	1.77865e-10	0.00124163	1.87964e-10	0.00187253	0.00158264	0.0030266	0.00299136	2.05084e-10	0.00147506	1.90325e-10	0.00207608	0.00161911	0.00100353	0.00355186	0.00133272	0.00117972	0.00251753	0.00126244	0.00151999	0.00126242	0.00130873	0.000593171	0.002654	0.0011281	0.00157478
677	unknown	690.643	17.9108,0	30	292	0.000532806	0.000400754	0.000871861	0.000443181	2.29143e-10	1.96134e-10	0.000579665	2.29769e-10	0.0002989	0.000316506	0.000776751	2.32747e-10	0.000927975	1.93412e-10	0.000761654	2.51893e-10	0.000546122	0.000513753	0.00058229	0.000702127	0.000292326	0.000660561	0.000600551	0.000368068	2.39935e-10	2.58808e-10	2.05084e-10	0.000365155	0.00054967	0.000599591	0.000389676	9.75894e-05	2.9087e-10	2.46268e-10	3.544e-10	3.74856e-10	1.79445e-10	3.27053e-10	3.02577e-10	2.76025e-10	3.18323e-10	1.70644e-10	4.97681e-10	2.27276e-10
681	indole-3-acetic acid	821.219	17.9938,0	66	202	0.00386666	0.00323064	0.0030129	3.33485e-10	0.000984841	1.96134e-10	0.00173176	0.00364361	0.00129127	0.00115006	0.00165755	0.00242097	2.50734e-10	0.00314029	0.00128739	0.00767554	0.00349526	0.00189115	0.00219742	0.00112331	0.00231655	0.0015388	0.00219318	0.00192874	0.0028589	0.0031227	0.00343341	0.00275501	0.000807316	0.00212047	0.00222919	0.000216428	0.00154106	0.00293429	0.0014507	0.00180457	0.00402831	0.00125442	0.00299876	0.00106466	0.00654376	0.00235067	0.00195232	0.00373198
684	Analyte 1005	194.875	18.0342,0	57	121	0.00050398	7.30204e-05	0.000336927	0.000556837	4.59928e-05	0.000149223	7.37829e-05	9.57592e-05	3.69644e-10	5.91342e-05	0.000263985	2.32747e-10	0.000437765	1.93412e-10	0.000489848	2.51893e-10	2.70507e-10	0.000126541	0.00028448	0.000164639	3.22367e-05	0.000186276	4.36705e-05	2.22728e-10	2.39935e-10	0.000430173	2.05084e-10	3.58712e-05	1.90325e-10	2.14164e-10	0.000146338	5.89232e-05	0.00010118	0.000152884	0.000337538	0.00020646	6.42067e-05	0.000143762	0.000105967	0.000234334	0.00102376	0.000615207	0.000218487	0.000176106
686	Analyte 1007	260.125	18.0722,0	23	204	0.000128515	9.54347e-05	2.33903e-10	0.000133564	2.29143e-10	0.000174579	7.77026e-05	0.000154268	0.000886879	7.52325e-05	0.000164841	0.000265558	0.000578944	1.93412e-10	0.000312476	2.51893e-10	2.70507e-10	7.03818e-05	2.02699e-10	0.000106105	2.17118e-10	1.87964e-10	2.15301e-10	2.22728e-10	2.39935e-10	2.58808e-10	2.05084e-10	2.86053e-10	0.000156302	2.14164e-10	0.000112693	4.29156e-10	2.9087e-10	2.46268e-10	3.544e-10	3.74856e-10	1.79445e-10	3.27053e-10	3.02577e-10	2.76025e-10	3.18323e-10	1.70644e-10	4.97681e-10	2.27276e-10
692	N-alpha-Acetyl-L-ornithine 1	449.468	18.1317,0	63	174	0.000477551	0.000539289	0.000565371	0.000674852	0.000165588	0.000511747	0.000176304	0.0015917	0.000459807	0.000695218	0.0011965	0.00103438	2.50734e-10	0.00079019	0.000643809	2.51893e-10	0.000283069	0.000678605	0.000191467	0.00174026	0.000200157	1.87964e-10	0.000210438	0.000205296	0.000241956	0.000492733	0.000590107	0.000250014	0.000265555	0.000211266	0.000502775	0.0018147	0.000725429	0.000485146	0.00204616	3.74856e-10	1.79445e-10	0.000879671	0.00081934	0.0013401	3.18323e-10	1.70644e-10	0.00128096	0.000345232
695	Analyte 1017	266.75	18.1502,0	32	288	1.73992e-10	1.75e-05	6.36334e-05	4.21362e-05	2.29143e-10	1.96134e-10	4.41314e-05	5.66023e-05	1.23955e-05	2.16842e-05	2.22855e-05	3.17744e-05	9.83225e-05	6.66019e-05	2.04553e-05	2.51893e-10	2.0591e-05	4.23039e-05	2.02699e-10	3.50356e-05	2.53372e-05	1.87964e-10	2.15301e-10	2.22728e-10	2.39935e-10	2.58808e-10	2.05084e-10	2.86053e-10	1.90325e-10	2.14164e-10	2.06931e-05	4.29156e-10	2.9087e-10	2.46268e-10	3.544e-10	3.74856e-10	1.79445e-10	3.27053e-10	3.02577e-10	2.76025e-10	3.18323e-10	1.70644e-10	4.97681e-10	2.27276e-10
702	gluconic acid 1	941.094	18.251,0	65	333	0.00598601	0.0025408	2.33903e-10	0.00589141	0.00904225	0.00841044	0.00119254	0.00482576	0.00210267	0.00138627	0.00354248	0.00686859	0.00994799	0.0141989	0.00685936	0.0105466	0.0108564	0.00193832	0.00454812	0.00870393	0.00173171	0.0037586	0.00524113	2.22728e-10	0.00910336	0.0085567	2.05084e-10	0.00198133	0.00692897	0.00541618	0.00540356	0.00161747	0.00304291	0.00875131	0.00171905	0.00414199	0.00176125	0.0021324	0.00182502	0.00157236	3.18323e-10	0.00494639	0.0030152	0.0125629
704	Analyte 1034	184.462	18.31,0	25	186	0.000129394	4.09074e-10	5.49514e-05	7.91587e-05	0.000188174	9.04353e-05	3.47496e-10	2.29769e-10	2.48733e-05	4.54708e-05	2.68849e-05	2.32747e-10	2.50734e-10	1.93412e-10	9.71435e-05	2.51893e-10	2.70507e-10	4.67462e-10	2.02699e-10	3.1015e-05	2.17118e-10	5.14457e-05	3.38286e-05	2.22728e-10	7.77252e-05	3.19987e-05	2.05084e-10	2.86053e-10	7.30652e-05	3.24122e-05	3.55993e-05	4.29156e-10	2.9087e-10	0.000132761	3.544e-10	3.74856e-10	4.62874e-05	3.27053e-10	3.02577e-10	2.76025e-10	3.18323e-10	1.70644e-10	4.97681e-10	2.27276e-10
705	Saccharic acid	894.588	18.3538,0	69	333	0.000886396	0.000435156	0.00126112	0.00105598	0.00182188	0.000917976	0.000582609	0.00113814	0.00051076	0.000422387	0.000788069	0.00139288	0.00237793	0.00146444	0.00119642	2.51893e-10	0.000854622	0.000491324	0.00120238	0.000795265	0.000488237	0.000839115	0.000765097	0.000545128	0.000944204	0.000741343	2.05084e-10	0.000580057	0.000745993	0.000850449	0.000869845	0.00110696	0.000565037	0.00111795	0.000586063	0.000936537	0.000496772	0.000486342	0.000523484	0.000585256	3.18323e-10	0.00097076	0.00075071	0.000826557
706	gluconic acid 1	804.354	18.38,0	67	205	0.000274576	5.92437e-06	0.000621279	0.000264924	0.00054439	0.000230122	0.000115659	0.00022699	3.69644e-10	0.000128262	0.000210746	0.000309592	2.50734e-10	0.000436779	0.00031844	2.51893e-10	0.000243211	0.000158151	0.000332704	0.000198937	0.000129828	0.000233881	0.000221067	0.000186656	0.000282794	0.000704137	2.05084e-10	0.000121244	0.00018224	0.000295811	0.000232612	0.000267612	0.000184663	0.000206061	0.000172893	0.00018703	0.000163988	0.000133252	3.02577e-10	0.000177792	3.18323e-10	0.000215737	0.000143604	0.0001838
710	Guanidinosuccinic acid 3	670.842	18.458,0	58	444	8.1336e-05	4.01221e-05	2.33903e-10	5.25146e-05	2.29143e-10	9.04873e-05	3.05788e-05	5.34143e-05	3.69644e-10	4.6093e-05	6.07028e-05	4.07841e-05	2.50734e-10	5.97281e-05	6.9662e-05	2.51893e-10	9.07499e-05	6.65072e-05	2.02699e-10	1.77865e-10	3.23429e-05	0.000112151	2.15301e-10	9.91554e-05	9.42491e-05	9.17899e-05	0.000128388	4.67489e-05	7.74117e-05	3.51249e-05	5.00014e-05	8.96484e-05	6.34149e-05	7.95813e-05	4.92225e-05	4.27342e-05	2.88198e-05	6.65827e-05	3.02577e-10	3.97775e-05	3.18323e-10	7.79933e-05	2.88197e-05	2.27276e-10
712	Analyte 1047	403	18.5198,0	67	318	0.00274082	0.00101545	0.00215292	0.0033879	0.00386693	0.00239223	0.00132968	0.00203939	0.000836547	0.00169548	0.00158494	0.00346588	2.50734e-10	1.93412e-10	0.00250231	2.51893e-10	0.00136689	0.00216205	0.00227279	0.00225268	0.000920312	1.87964e-10	0.00135232	0.00141087	0.001335	0.00238736	2.05084e-10	0.00106245	0.0019905	0.00144329	0.00163223	0.00281613	0.00189014	0.00101202	0.000728327	0.00263206	0.000703635	0.00237357	0.000829403	0.0017804	3.18323e-10	0.00321585	0.00310631	0.00174227
713	beta-Hydroxymyristic acid	479.923	18.474,0	48	204	0.000233981	4.09074e-10	2.33903e-10	3.33485e-10	0.000680611	0.000162969	3.47496e-10	0.000196044	3.69644e-10	5.01116e-05	0.000998967	0.000222083	2.50734e-10	1.93412e-10	1.92321e-10	2.51893e-10	0.000384733	4.67462e-10	0.000275806	9.30156e-05	0.000163201	0.000277998	2.15301e-10	0.0001636	0.000554831	2.58808e-10	2.05084e-10	0.000227505	0.000198238	2.14164e-10	0.00016279	0.0001441	0.000104489	0.000102913	8.25522e-05	8.455e-05	0.000101967	3.27053e-10	3.02577e-10	2.76025e-10	3.18323e-10	0.000124875	4.97681e-10	0.000226913
719	trans-3,5-Dimethoxy-4-hydroxycinnamaldehyde 2	280.071	18.6362,0	68	91	0.00503701	0.00301534	0.00117931	0.000507971	0.00457494	0.00260988	0.00224873	0.00364262	0.000909947	0.00129192	0.004138	0.00418172	2.50734e-10	0.00238932	0.0015787	2.51893e-10	0.00765162	0.00187043	0.00212238	0.00155752	0.00247288	0.00276301	0.00123459	0.00237588	0.00741693	0.00177504	0.00345281	0.00314249	0.00220574	0.00137769	0.00262415	0.00822496	0.00737223	0.00387652	0.00175113	0.00257802	0.00427346	0.00166644	0.00164352	0.00156953	0.00576107	0.00324119	0.00349334	0.00769356
723	Analyte 1064	401.227	18.7394,0	44	111	0.000264139	4.09074e-10	2.33903e-10	4.26484e-05	2.29143e-10	0.000244333	0.000103488	0.00012836	3.69644e-10	8.1539e-05	4.48439e-05	2.32747e-10	2.50734e-10	0.000174427	1.92321e-10	0.000249093	2.70507e-10	4.67462e-10	0.000249661	1.77865e-10	0.00013067	1.87964e-10	0.000197881	6.09062e-05	2.39935e-10	6.68389e-05	2.05084e-10	0.000139831	0.000195675	0.000215855	8.63398e-05	4.29156e-10	2.9087e-10	5.87909e-05	3.544e-10	3.74856e-10	1.79445e-10	3.27053e-10	3.02577e-10	0.000279831	0.00032545	1.70644e-10	4.97681e-10	0.000111446
724	palmitic acid	841.317	18.7503,0	64	117	1.73992e-10	0.000669951	0.00129059	0.000709249	2.29143e-10	0.000788294	0.000980233	0.000670259	0.000535619	0.000859213	0.000942447	2.32747e-10	2.50734e-10	0.000444586	0.000916368	2.51893e-10	0.000890686	0.0010439	2.02699e-10	0.000403117	0.00077156	1.87964e-10	0.00071164	0.000421747	0.000747566	0.00132464	0.000613961	0.000808903	0.00063957	0.000729038	0.000597105	0.00151889	0.000679465	0.000639631	0.00115289	0.000588001	0.000459871	0.000487726	0.00062399	0.000667447	0.000943471	0.000614812	0.000936454	0.000743429
726	Analyte 1068	261.515	18.7879,0	38	365	8.46195e-05	4.74475e-05	2.33903e-10	3.33485e-10	2.29143e-10	4.32829e-05	3.47496e-10	2.29769e-10	3.69644e-10	2.88119e-05	3.36251e-10	2.32747e-10	2.50734e-10	1.93412e-10	1.92321e-10	2.51893e-10	0.000101764	4.67462e-10	2.02699e-10	1.77865e-10	7.67818e-05	1.87964e-10	2.15301e-10	3.66009e-05	6.22672e-05	3.50241e-05	2.05084e-10	5.00754e-05	2.39886e-05	1.33532e-05	2.0134e-05	9.936e-05	9.08574e-05	2.46268e-10	5.52568e-05	3.74856e-10	1.79445e-10	4.8662e-05	3.02577e-10	2.76025e-10	6.45111e-05	5.40236e-05	4.97681e-10	0.000116812
727	mucic acid	636.589	18.7979,0	57	333	1.73992e-10	1.91592e-05	4.48945e-05	9.01043e-05	2.29143e-10	6.09888e-05	3.81248e-05	5.53766e-05	1.88247e-05	3.10223e-05	4.52529e-05	4.42914e-05	2.50734e-10	1.93412e-10	7.67375e-05	2.51893e-10	7.4895e-05	3.49744e-05	8.21646e-05	1.77865e-10	3.01978e-05	1.87964e-10	5.14872e-05	3.66003e-05	6.28789e-05	4.39093e-05	9.01762e-05	2.86053e-10	4.82581e-05	4.46228e-05	3.74981e-05	7.45151e-05	4.18925e-05	6.01311e-05	4.49175e-05	5.96701e-05	4.43824e-05	4.14546e-05	2.23643e-05	2.76025e-10	3.18323e-10	5.4348e-05	4.19874e-05	5.71421e-05
728	L-dopa 1	671.083	18.8462,0	67	267	1.73992e-10	0.00063081	7.69821e-05	8.28668e-05	0.000309273	6.4026e-05	8.83514e-05	6.92895e-05	3.69644e-10	5.40881e-05	0.000119454	7.12094e-05	0.000304221	6.41056e-05	7.03615e-05	2.51893e-10	8.52121e-05	6.9229e-05	0.000203506	6.70067e-05	5.67321e-05	0.000209509	5.35962e-05	4.50258e-05	0.000107285	5.8027e-05	2.05084e-10	4.0759e-05	4.99325e-05	5.79906e-05	0.000103628	4.29156e-10	2.9087e-10	2.46268e-10	3.544e-10	0.000495075	0.000211629	0.000339229	0.000244446	0.000209656	0.000417925	0.000342247	0.000327643	0.000201071
743	myo-inositol	933.154	19.1159,0	66	217	1.73992e-10	0.00222068	0.0119023	0.00525887	2.29143e-10	0.00974716	0.0088803	0.00441154	0.00309151	0.0087892	0.00860088	0.00578187	2.50734e-10	0.0024926	0.0117538	2.51893e-10	0.00405398	0.00508916	0.00779069	0.00701504	0.00337269	1.87964e-10	0.00772238	0.0101157	0.00474056	0.0131639	2.05084e-10	0.00382251	0.00710234	0.00769467	0.00548714	0.0303964	2.9087e-10	0.00482476	0.00419689	0.00423221	0.00290016	0.00268789	0.00295432	0.00465496	0.0124606	0.00546475	0.00723717	0.00465422
744	unknown	204.088	19.1265,0	41	365	1.73992e-10	0.00024506	2.33903e-10	5.03515e-05	2.29143e-10	1.96134e-10	6.46877e-05	2.29769e-10	3.8082e-05	0.000174431	0.000178893	2.32747e-10	2.50734e-10	6.88481e-05	0.000110355	2.51893e-10	0.000491426	0.000114407	2.02699e-10	1.77865e-10	0.000530468	1.87964e-10	2.15301e-10	2.22728e-10	0.000384644	2.58808e-10	2.05084e-10	0.00051264	0.000245636	2.14164e-10	0.000106998	4.29156e-10	0.000905886	2.46268e-10	0.000174582	8.50153e-05	0.000134333	0.000234116	0.000142391	0.000183784	3.18323e-10	0.00021576	0.000126212	2.27276e-10
750	uric acid	900.033	19.2648,0	60	442	0.028359	0.0413767	0.0287319	0.0392338	2.29143e-10	0.0151156	3.47496e-10	0.0486584	0.0242851	0.0313552	0.0404053	0.0431741	0.0511476	0.0142261	0.0201131	2.51893e-10	0.0189259	0.051911	2.02699e-10	1.77865e-10	0.0280117	1.87964e-10	2.15301e-10	0.0300877	0.0165433	0.0308399	0.0251888	0.0336481	0.013315	0.0112229	0.0228625	0.0397993	0.0247226	0.0293276	0.0394935	0.00930608	0.031874	0.0342288	0.05509	0.042858	3.18323e-10	0.0196692	0.0517443	0.0247552
765	Glucoheptonic acid 3	690.159	19.5406,0	63	319	0.00251951	0.000624503	0.00047852	0.00112217	2.29143e-10	1.96134e-10	0.000574589	2.29769e-10	0.000390514	0.000781646	0.000940418	0.000874923	2.50734e-10	0.00168372	0.00110474	0.00285667	0.00248005	0.000754318	0.00165175	0.00102729	0.000493477	1.87964e-10	0.000731828	0.000708475	0.000920673	0.000530026	0.00190272	0.000514611	0.000928428	0.000736669	0.000911075	0.000671875	0.00114032	0.00124295	0.00129025	0.00117093	0.000519332	0.000567543	3.02577e-10	0.00128804	3.18323e-10	0.00139068	0.000831934	0.0013859
768	3,4-dihydroxycinnamic acid	713.372	19.5959,0	43	219	1.73992e-10	0.00296576	2.33903e-10	0.000436373	2.29143e-10	1.96134e-10	0.000187955	2.29769e-10	0.000106794	0.000117978	0.000103528	2.32747e-10	2.50734e-10	1.93412e-10	0.000120072	0.00023873	2.70507e-10	0.00010467	2.02699e-10	1.77865e-10	2.17118e-10	1.87964e-10	9.21463e-05	2.22728e-10	2.39935e-10	2.58808e-10	0.00015834	2.86053e-10	6.20353e-05	8.25556e-05	0.000159231	4.29156e-10	2.9087e-10	2.46268e-10	3.544e-10	0.00202246	1.79445e-10	0.00144063	0.00103419	2.76025e-10	0.00291678	0.000952988	0.00117967	0.000904852
774	Analyte 1150	338	19.7407,0	31	300	0.000256018	0.000133592	7.39128e-05	3.33485e-10	0.000285204	0.000111616	0.000105774	8.4493e-05	5.9797e-05	3.52643e-10	3.36251e-10	2.32747e-10	0.000377855	0.000299347	6.76581e-05	2.51893e-10	2.70507e-10	5.7984e-05	2.02699e-10	7.15843e-05	0.000148718	1.87964e-10	2.15301e-10	0.000147398	0.000299862	8.73848e-05	2.05084e-10	0.00017649	1.90325e-10	2.14164e-10	9.4823e-05	0.000167213	0.000313707	2.46268e-10	7.66357e-05	3.74856e-10	1.79445e-10	5.844e-05	3.02577e-10	2.76025e-10	3.18323e-10	1.70644e-10	4.97681e-10	2.27276e-10
780	Analyte 1159	275.417	19.8049,0	68	193	0.000616775	0.000330057	0.000876928	0.00308532	2.29143e-10	0.00205208	0.000876811	0.00230033	0.00012508	0.000313424	0.000776304	2.32747e-10	0.00562126	1.93412e-10	0.000269091	0.000512106	0.00217476	0.000730738	6.1232e-05	0.000545334	0.000830122	0.0042906	0.000899539	0.000554335	0.000380896	0.000690785	2.05084e-10	0.000911897	0.00163585	0.000970038	0.00108106	0.000317247	0.000125951	0.000796636	0.000445859	0.000102006	0.00168011	0.000189947	0.000682547	0.000461607	0.00412447	1.70644e-10	0.000306471	0.000359159
783	Indolelactate 2	734.962	19.9097,0	54	202	0.000104368	4.09074e-10	2.33903e-10	0.000246978	0.000610254	0.000653964	0.00010025	0.000943125	4.82208e-05	0.00022484	0.000147742	0.000499856	2.50734e-10	0.000748464	0.000203875	0.000603072	2.70507e-10	0.000552446	0.000153694	0.000198067	0.000152502	0.000857401	0.000207569	2.65196e-07	0.000391974	2.58808e-10	0.000222604	0.000152023	0.00051134	0.000218471	0.000291779	0.000220442	2.9087e-10	0.000193846	0.000499696	0.000272928	1.79445e-10	0.000145425	0.000182796	0.000170061	3.18323e-10	0.000336531	0.000143706	0.000157383
790	Analyte 1178	0	20.0723,0	68	243	0.000243939	0.000571173	0.000307801	0.000514087	2.29143e-10	0.0003744	0.000926458	0.000600818	0.000786221	0.000675682	0.00104957	0.000705317	0.000820813	1.93412e-10	0.00042022	2.51893e-10	2.70507e-10	0.000986989	0.000659491	0.000401876	0.000407363	1.87964e-10	0.000295024	0.000393831	0.000549188	0.000514996	0.000583773	0.000554446	0.000294448	0.000280326	0.000463942	0.000842349	0.000272284	0.00033797	0.000447862	0.000533386	0.000298055	0.000608176	0.000483159	0.00050841	0.000598934	0.000367492	0.0011918	0.000518011
795	unknown	338.877	20.2721,0	58	202	0.00403648	0.00160565	0.000565064	0.00225271	2.29143e-10	0.00575716	0.000918654	0.00379297	0.00114666	0.00242156	0.00230648	0.00251583	2.50734e-10	1.93412e-10	1.92321e-10	0.0105003	0.0031631	0.00279087	0.00151663	0.00332551	0.000816329	1.87964e-10	0.000787675	0.00129676	0.00378311	2.58808e-10	2.05084e-10	2.86053e-10	0.00388879	0.000664852	0.00199511	0.0044799	0.00283882	0.00539642	0.00449798	0.00803271	0.00308626	0.00362834	3.02577e-10	0.0031285	0.00472411	0.00344871	0.00338176	0.00227461
796	5-Hydroxyindole-3-acetic acid 1	838.147	20.2744,0	69	290	0.000567137	0.000623744	0.00096619	0.000684126	2.29143e-10	0.00119053	0.000469027	0.00113131	0.00193054	0.000778273	0.000636439	0.000791837	0.00132421	1.93412e-10	1.92321e-10	0.0011835	2.70507e-10	0.000641583	0.000628381	0.00115129	0.000489885	1.87964e-10	0.000524405	0.000986913	0.00130671	0.000943871	2.05084e-10	0.000549664	0.00101569	0.000499425	0.000700489	0.000379155	0.000959612	0.00102213	0.000561618	0.00085921	1.79445e-10	0.000476876	0.000366933	0.000835203	0.00286237	0.000759055	0.00171627	0.000808203
801	6-Aminopenicillanic acid 2	289.226	20.3811,0	48	234	0.000176573	4.09074e-10	2.33903e-10	3.33485e-10	2.29143e-10	0.000709324	0.000190589	0.000693032	0.000224274	0.000135891	0.000332146	2.32747e-10	0.000364198	1.93412e-10	0.00040232	0.000938946	2.70507e-10	0.000157453	2.02699e-10	0.000452829	0.000843169	1.87964e-10	0.000384561	0.00061368	0.00187465	2.58808e-10	2.05084e-10	0.000791319	0.000683618	0.000387583	0.000345205	0.000217182	0.000511526	0.000310778	8.94975e-05	0.000292942	0.000519846	3.27053e-10	3.02577e-10	2.76025e-10	0.00146041	1.70644e-10	0.00013434	0.00112228
802	Analyte 1201	340.875	20.4576,0	69	70	0.00436511	0.00775349	0.00892498	0.0100175	2.29143e-10	0.00969049	0.00676523	0.0146648	0.00753836	0.0059069	0.00916493	0.00740828	0.0227134	1.93412e-10	1.92321e-10	0.00591428	2.70507e-10	0.00712728	0.0136479	0.0154574	0.00805194	1.87964e-10	0.00708599	0.00865547	0.0173667	0.00796622	0.0201026	0.00854331	0.00834717	0.00673752	0.00833057	0.00631637	0.0134649	0.0127198	0.0156188	0.0181721	0.0135482	0.0101329	0.0104537	0.014624	3.18323e-10	0.00483812	0.00649774	0.0106971
803	stearic acid	888.704	20.5262,0	27	117	0.00187259	0.00107803	0.00154665	0.00125521	0.00301792	0.000985992	0.00195489	0.00101365	0.00100598	0.00137168	0.00151906	0.0011413	0.0019401	1.93412e-10	0.00148473	0.000923192	0.00357487	0.00188626	0.00115448	1.77865e-10	2.17118e-10	1.87964e-10	2.15301e-10	2.22728e-10	2.39935e-10	2.58808e-10	2.05084e-10	2.86053e-10	1.90325e-10	2.14164e-10	0.000957553	4.29156e-10	2.9087e-10	2.46268e-10	3.544e-10	3.74856e-10	1.79445e-10	3.27053e-10	3.02577e-10	2.76025e-10	3.18323e-10	1.70644e-10	4.97681e-10	2.27276e-10
804	Analyte 1204	342.5	20.5214,0	68	193	0.00115042	0.00142626	0.00256891	0.00687803	0.0114783	0.00656672	0.00594033	0.00617744	0.000625787	0.00121116	0.0012157	0.0112775	0.00390483	1.93412e-10	0.00543497	0.00164825	0.014001	0.00133018	0.0115811	0.00796924	0.00554469	1.87964e-10	0.00254496	0.00123539	0.00239312	0.00181013	2.05084e-10	0.00526469	0.00612027	0.00240602	0.00432351	0.00120974	0.0017448	0.00272779	0.00167693	0.00405297	0.00704185	0.00945359	0.000861544	0.0025198	3.18323e-10	0.00354989	0.000868312	0.00159024
807	xanthurenic acid	637.485	20.6816,0	66	406	6.84574e-05	6.71167e-05	9.37576e-05	8.20512e-05	2.29143e-10	0.000120113	9.08515e-05	0.000104909	3.65423e-05	5.67969e-05	0.000117008	0.000111168	0.000148638	0.000209619	0.000107999	0.000207857	2.70507e-10	5.20048e-05	0.000234309	0.00010145	6.48094e-05	1.87964e-10	8.74318e-05	8.32268e-05	0.0001195	8.14466e-05	0.00023523	7.22276e-05	0.000112105	8.01109e-05	9.82246e-05	2.89555e-05	5.77006e-05	8.22752e-05	7.78335e-05	0.000190336	5.6053e-05	0.000138103	8.49231e-05	0.000186079	0.000222793	0.000124099	9.66031e-05	0.000110347
808	Analyte 1214	289.6	20.7049,0	52	129	1.46026e-05	4.09074e-10	0.000258553	0.000572121	2.29143e-10	0.000355487	0.000109081	8.19268e-05	3.69644e-10	3.52643e-10	0.000318941	8.87056e-05	2.50734e-10	1.93412e-10	0.000419706	0.000464197	0.000692462	0.000193814	2.02699e-10	0.000189356	5.83813e-05	1.87964e-10	0.000183424	0.00012999	0.000163993	2.58808e-10	2.05084e-10	2.86053e-10	0.000291035	0.000185329	0.000159037	4.29156e-10	2.9087e-10	5.37451e-05	7.23573e-05	6.9307e-05	0.000139756	0.000485253	0.000159339	2.76025e-10	3.18323e-10	0.000404729	4.97681e-10	0.000177549
810	unknown	315.906	20.7956,0	67	221	1.73992e-10	0.000166809	0.000182317	0.000229501	2.29143e-10	0.000156075	0.000165588	0.00015354	0.000158157	0.000169806	0.000135714	0.000140064	0.00018241	1.93412e-10	0.000144769	2.51893e-10	2.70507e-10	0.000119202	0.000116764	0.00014686	0.000108594	0.000157254	0.000168615	0.000159724	0.000151104	0.000145975	0.000132444	0.000171262	9.0088e-05	0.000132453	0.00012617	0.000246535	0.000130031	0.000177441	0.000182985	0.000142762	9.54569e-05	0.000131528	0.000141779	0.000151078	3.18323e-10	0.00016603	0.000203834	0.000169178
811	cystine	545.833	20.8769,0	56	73	1.73992e-10	0.00146875	0.00251076	0.000848711	0.00312881	0.00552181	0.00161356	0.00129576	0.00170829	0.00150669	0.00150077	2.32747e-10	0.000589553	1.93412e-10	1.92321e-10	2.51893e-10	2.70507e-10	0.00156574	0.000397982	0.00485709	0.00219984	0.00335342	2.15301e-10	2.22728e-10	0.00290193	0.000317106	0.00973087	0.00181852	0.00381373	0.00285531	0.00185017	0.0146734	0.0034718	0.00626852	0.00509328	3.74856e-10	1.79445e-10	0.00418756	3.02577e-10	2.76025e-10	3.18323e-10	0.00570583	0.00329248	2.27276e-10
815	Phenyl beta-D-glucopyranoside	526.667	21.0495,0	68	204	1.73992e-10	0.0033532	0.00132454	0.00866307	0.00754383	0.00162975	0.00117114	0.00236395	0.0015942	0.0026065	0.00362208	0.00210587	0.00163589	0.00431606	0.00222768	0.00159738	2.70507e-10	0.000760269	0.00144475	0.00525045	0.000508486	0.00159979	0.0053949	0.00184945	0.00227212	0.00125369	0.00415162	0.000517558	0.00141428	0.00501809	0.00257302	0.00106175	0.00659176	0.00661006	0.00414647	0.00812067	1.79445e-10	0.00180089	0.0126672	0.00195302	0.00794999	0.00451051	0.003882	0.00458833
820	Analyte 1233	469	21.2473,0	63	217	1.73992e-10	0.0203898	0.0457638	0.0409319	0.0680079	0.0567154	0.0182364	0.0447306	0.0149126	0.0209194	0.04017	0.0443147	0.0473207	1.93412e-10	0.0658002	0.0463343	2.70507e-10	0.0247526	0.0557525	1.77865e-10	0.0311072	0.0761486	0.0371238	0.0323695	0.0624385	0.0441615	0.0922127	0.0337267	0.0480017	0.0350103	0.0382451	0.0272872	0.0407151	0.0523421	0.0282738	0.0473779	0.0389505	0.0396452	0.0196892	2.76025e-10	3.18323e-10	0.0423206	0.0286229	0.0371202
824	Analyte 1237	236.455	21.311,0	42	174	1.73992e-10	0.000308228	0.000566998	0.000850097	0.000558713	1.96134e-10	0.00013279	0.00024901	1.84626e-05	3.52643e-10	3.36251e-10	0.000434555	0.000171566	0.00071764	0.000355995	2.51893e-10	2.70507e-10	0.000270229	0.000251987	1.77865e-10	0.000164799	0.000347061	0.000174781	2.22728e-10	2.39935e-10	2.58808e-10	2.05084e-10	0.000156056	0.00027613	2.14164e-10	0.00020017	4.29156e-10	2.9087e-10	2.46268e-10	0.000350868	0.00116903	1.79445e-10	0.000733443	0.000411828	0.000325913	3.18323e-10	1.70644e-10	0.000580885	0.000609553
828	Analyte 1242	0	21.4103,0	56	169	1.73992e-10	0.000779317	0.00122908	0.000115253	2.29143e-10	0.000619285	0.00152323	0.000546747	4.3047e-05	0.000268322	0.000582503	2.32747e-10	0.000149231	1.93412e-10	1.92321e-10	2.51893e-10	2.70507e-10	0.00115232	0.000445251	1.77865e-10	0.00108296	0.000582906	0.00056734	2.22728e-10	0.000764181	2.58808e-10	0.000948893	0.00109737	0.000567043	0.000504181	0.000452282	8.32412e-05	2.9087e-10	0.000244918	0.000309294	0.000312321	0.000310918	8.09442e-05	0.000153658	2.76025e-10	3.18323e-10	0.000247803	0.00027044	0.000290034
829	Analyte 1243	0	21.4253,0	62	204	1.73992e-10	0.000399772	0.000923658	0.000150817	0.000819019	0.000832546	0.000462991	0.00022756	0.000270376	0.000266722	0.000397465	0.0009721	2.50734e-10	0.00100338	0.000860428	0.000426675	0.000368109	0.000443107	0.000499479	1.77865e-10	0.000429501	0.000338938	0.0013799	2.22728e-10	0.000704762	0.00062442	0.000665206	0.00045055	0.000757057	0.00121762	0.000529739	0.000221462	0.000554194	0.000585132	0.000370225	0.00078022	0.000568512	0.000356905	3.02577e-10	0.000446133	3.18323e-10	0.000379548	0.000354442	0.000502054
831	unknown	558.083	21.5409,0	37	103	1.73992e-10	0.00019599	2.33903e-10	0.000243159	0.000597833	0.000332853	0.000150916	0.000374954	0.000112764	0.000139799	0.000208328	0.000316622	0.000326903	0.00045065	1.92321e-10	0.000256297	2.70507e-10	0.00012915	0.000314096	0.000247499	0.000157922	0.000261801	0.000209079	0.00021774	0.000342473	0.000161666	2.05084e-10	0.000133645	0.000292907	0.000173052	0.000211603	0.000189413	0.00030939	2.46268e-10	3.544e-10	3.74856e-10	1.79445e-10	3.27053e-10	3.02577e-10	2.76025e-10	3.18323e-10	1.70644e-10	4.97681e-10	2.27276e-10
832	pyridoxal phosphate 2	275.933	21.5509,0	48	250	1.73992e-10	4.42229e-05	4.08477e-05	3.33485e-10	7.14918e-05	1.96134e-10	2.91431e-05	2.29769e-10	3.69644e-10	2.71638e-05	5.70856e-05	7.01608e-05	4.31875e-05	8.25104e-05	0.000100073	0.000113891	2.70507e-10	3.18051e-05	4.49617e-05	5.28916e-05	2.17118e-10	0.000102491	2.15301e-10	2.64889e-05	0.000107401	2.58808e-10	2.05084e-10	2.32797e-05	3.51132e-05	2.14164e-10	3.68071e-05	6.63249e-05	2.9087e-10	0.000122896	7.49425e-05	0.000103502	1.79445e-10	3.11047e-05	3.02577e-10	2.76025e-10	0.000144326	1.70644e-10	4.97681e-10	6.06961e-05
833	Analyte 1250	175.864	21.591,0	29	243	1.73992e-10	7.23083e-05	2.73937e-05	1.9728e-05	2.06544e-05	6.34684e-06	3.47496e-10	2.29769e-10	3.69644e-10	3.52643e-10	3.36251e-10	2.32747e-10	2.50734e-10	1.93412e-10	1.92321e-10	2.51893e-10	2.70507e-10	4.67462e-10	2.02699e-10	1.77865e-10	2.17118e-10	1.87964e-10	2.15301e-10	2.22728e-10	2.39935e-10	2.58808e-10	2.05084e-10	2.86053e-10	1.90325e-10	2.14164e-10	4.88125e-06	0.00014652	6.53917e-05	6.42744e-05	3.544e-10	0.000104112	4.5262e-05	5.5248e-05	4.80545e-05	4.11684e-05	0.000108327	1.70644e-10	6.24462e-05	5.46121e-05
834	Purine riboside	649.933	21.647,0	69	262	1.73992e-10	5.43674e-05	8.55122e-05	6.20265e-05	0.000175854	0.000121299	8.81712e-05	0.000124985	4.07732e-05	6.95412e-05	7.69462e-05	0.000120328	0.000130843	0.000163419	0.000151558	0.000102246	0.000144489	8.78095e-05	0.000129002	1.77865e-10	6.88092e-05	0.000116174	6.07401e-05	0.000110411	0.000120841	6.50225e-05	2.05084e-10	5.68377e-05	0.000110434	5.42471e-05	8.97563e-05	7.13873e-05	0.000114523	0.000210549	9.29164e-05	0.000150861	0.000116667	0.000114166	9.40741e-05	0.000119295	3.18323e-10	0.000108385	0.00014296	0.000164433
835	Analyte 1252	619.704	21.6879,0	55	146	1.73992e-10	4.09074e-10	2.49718e-05	1.81738e-05	2.29143e-10	9.78606e-05	7.47793e-06	2.90284e-05	1.80595e-05	4.60176e-05	3.03946e-05	2.32747e-10	7.32138e-05	1.93412e-10	0.000103964	4.56186e-05	0.000111081	4.67462e-10	3.78846e-05	0.000108655	3.84755e-05	6.06672e-05	2.24317e-05	8.23882e-05	6.41664e-05	2.20598e-05	2.05084e-10	6.04152e-05	7.99584e-05	1.80424e-05	4.00336e-05	9.71674e-06	4.05207e-05	4.27164e-05	2.64668e-05	5.00854e-05	4.53156e-05	6.43526e-05	4.29848e-06	5.43758e-05	3.18323e-10	5.64566e-05	9.39608e-05	4.44001e-05
836	unknown	577.969	21.6954,0	68	246	1.73992e-10	0.000284121	0.000268936	0.000282162	0.000389918	0.000300126	0.000282901	0.00028046	0.000176637	0.000247457	0.000421387	0.000494179	0.00047177	0.00042545	0.000322715	0.000475264	0.000858038	0.000371918	0.000617084	1.77865e-10	0.000269521	0.000563193	0.000313233	0.000341471	0.000607924	0.000406875	2.05084e-10	0.000332285	0.000339411	0.000304559	0.0003483	0.000127091	0.000479298	0.000575538	0.000472528	0.000569415	0.000364878	0.000290117	0.000235664	0.00042401	0.00102143	0.00034726	0.000505863	0.000479475
837	unknown	495.136	21.7196,0	51	97	1.73992e-10	3.72217e-05	2.33903e-10	3.54291e-05	2.29143e-10	7.57093e-05	7.91115e-05	0.000131074	3.69644e-10	7.82284e-05	3.36251e-10	2.32747e-10	0.000166177	0.000186734	8.09544e-05	0.000137313	0.000134263	4.67462e-10	2.02699e-10	0.000127664	2.17118e-10	9.5464e-05	4.14411e-05	9.26307e-05	0.000102222	2.58808e-10	2.05084e-10	2.86053e-10	6.55611e-05	3.80999e-05	5.68434e-05	4.29156e-10	7.04166e-05	0.000247599	0.000136733	0.000197941	0.000122793	7.94487e-05	0.000103481	0.000136789	3.18323e-10	8.63423e-05	0.000170598	0.000176948
838	unknown	230.059	21.7459,0	57	258	1.73992e-10	2.25164e-05	4.85995e-05	4.41993e-05	0.00012867	0.000219304	2.60083e-05	9.73502e-05	3.69644e-10	2.75831e-05	3.78431e-05	7.11597e-05	6.21403e-05	1.93412e-10	1.92321e-10	8.35126e-05	0.000187761	2.10988e-05	2.02699e-10	0.000162058	3.31935e-05	1.87964e-10	5.3872e-05	5.20177e-05	0.000108354	2.58808e-10	2.05084e-10	4.90583e-05	0.000254233	5.73317e-05	6.15955e-05	0.000174989	7.48231e-05	0.000138177	3.544e-10	0.000102574	7.21757e-05	6.52506e-05	3.97677e-05	5.29447e-05	3.18323e-10	1.70644e-10	7.86047e-05	9.88298e-05
841	Analyte 1258	234	21.8054,0	66	103	1.73992e-10	0.000256515	0.000312869	0.000317005	0.00104581	0.000664704	0.000255614	0.000476895	0.000144747	0.000265557	0.000349382	0.00054043	0.000474646	0.000699717	0.00069783	0.000505822	0.00148118	0.000306692	0.000484245	1.77865e-10	0.000277878	0.000569378	0.000228752	0.000460393	0.00068049	0.000249965	2.05084e-10	0.000259847	0.000595045	0.000233409	0.000427827	0.000340007	0.000505865	0.000467199	0.000353664	0.000500484	0.000420819	0.000373275	0.000231261	0.00044503	3.18323e-10	0.000442518	0.000401057	0.000517811
842	Analyte 1261	0	21.8755,0	69	217	1.73992e-10	0.001386	0.00418166	0.00337142	2.29143e-10	0.00464476	0.00171677	0.00413081	0.00144456	0.00183562	0.00244428	0.00380721	0.00342853	0.00659882	0.00739429	0.00294355	0.00791826	0.00198715	0.00413865	0.00350616	0.00255193	0.00473462	0.00298261	0.00254114	0.00485298	0.00282181	2.05084e-10	0.00241559	0.00419558	0.00278906	0.00322546	0.00185003	0.00221142	0.00339414	0.00171042	0.00322224	0.00318053	0.00280431	0.00178336	0.00319502	3.18323e-10	0.00323805	0.00195498	0.00300422
844	Analyte 1263	303.143	21.9343,0	60	221	1.73992e-10	0.000165537	0.000183276	0.000246448	2.29143e-10	0.000147086	0.000141783	0.000110508	0.000152708	0.000153887	0.000132148	0.000124728	0.000157675	0.000127733	0.000147419	0.000135296	0.000258969	0.000107538	2.02699e-10	7.26159e-05	2.17118e-10	0.000180368	0.000178398	0.000150737	0.000121728	2.58808e-10	2.05084e-10	0.000124605	8.73579e-05	0.000122975	0.000117717	0.000237186	0.000137773	0.0001462	0.000170219	0.000163544	8.38483e-05	3.27053e-10	3.02577e-10	0.000145705	3.18323e-10	1.70644e-10	0.000180236	0.000147258
846	Analyte 1268	373.167	22.0215,0	63	73	1.73992e-10	0.0100483	0.00184288	3.33485e-10	2.29143e-10	0.0065071	0.00340935	0.0176611	0.0048885	0.00216477	0.00992849	0.0121285	0.00591321	0.016186	0.00259244	0.0039723	2.70507e-10	0.00138693	2.02699e-10	0.00112322	0.00285099	0.0105261	0.00227908	0.0160646	2.39935e-10	0.00157294	2.05084e-10	0.00288381	0.00563604	0.00232371	0.00479635	0.0213934	0.00404053	0.00580875	0.0070782	0.00887448	0.020463	0.00141861	0.003434	0.00181323	0.00920469	0.00190657	0.00509978	2.27276e-10
850	D-erythro-sphingosine 1	569.692	22.1272,0	33	204	1.73992e-10	8.2692e-05	0.000216763	3.33485e-10	0.000228754	8.89375e-05	9.16864e-05	0.0002083	6.49134e-05	6.93233e-05	3.36251e-10	2.32747e-10	2.50734e-10	1.93412e-10	1.92321e-10	2.51893e-10	6.69615e-05	2.50837e-05	0.000242571	1.77865e-10	2.17118e-10	0.000397662	0.000142281	2.22728e-10	4.4505e-05	2.58808e-10	2.05084e-10	0.000160198	7.66306e-05	0.000141258	7.82841e-05	4.29156e-10	0.000113053	2.46268e-10	3.544e-10	3.74856e-10	0.000146862	3.27053e-10	5.48738e-05	2.76025e-10	3.18323e-10	1.70644e-10	4.97681e-10	2.27276e-10
851	unknown	495.641	22.1874,0	51	159	0.000290332	6.94326e-05	2.05041e-07	0.000164461	0.000317292	0.000183648	0.000112715	0.000166287	4.6054e-05	6.92141e-05	3.36251e-10	0.000144293	2.50734e-10	1.93412e-10	1.92321e-10	2.51893e-10	0.000254323	4.67462e-10	2.02699e-10	0.000135801	2.04673e-06	1.87964e-10	2.15301e-10	4.45456e-10	0.000182829	2.58808e-10	2.05084e-10	2.86053e-10	0.000158084	0.000150399	8.15807e-05	0.000176489	0.000183128	0.000336491	7.68426e-05	0.000201686	9.39179e-05	9.97294e-05	0.000213003	0.000249938	0.000268789	1.70644e-10	9.47152e-05	0.00035732
853	uridine 1	442.562	22.2483,0	69	285	0.00119199	0.000632806	0.00105874	0.000980828	0.0022635	0.00119387	0.000571926	0.000900722	0.000424189	0.000548241	0.000813752	0.00105878	0.000954599	0.00128596	0.00112139	0.000947131	0.0016826	0.000641572	0.00124162	1.77865e-10	0.000717712	0.00132317	0.000888566	0.000775189	0.00133932	0.000847052	2.05084e-10	0.000670847	0.000935503	0.000802241	0.000927127	0.000707801	0.0010725	0.00122499	0.00109535	0.00144185	0.00088625	0.000950848	0.000600839	0.00111695	3.18323e-10	0.00101042	0.00099265	0.000974454
860	salicin	489.41	22.5025,0	58	259	1.73992e-10	9.79418e-06	0.000111234	0.000103988	2.29143e-10	0.00012724	3.00049e-05	0.000143787	5.5917e-05	2.38441e-05	4.37865e-05	9.72849e-05	5.29264e-05	0.000139023	1.92321e-10	5.23647e-05	0.00018386	4.67462e-10	4.70993e-05	1.77865e-10	5.40602e-05	8.70807e-05	6.6284e-05	8.9205e-05	0.000112691	5.23988e-05	2.05084e-10	4.05423e-05	7.85385e-05	5.48606e-05	6.19272e-05	4.29156e-10	4.05724e-05	5.88468e-05	3.544e-10	5.97738e-05	6.77802e-05	6.3425e-05	3.60434e-05	5.01944e-05	3.18323e-10	8.11692e-05	3.5606e-05	0.000118221
866	2-Monopalmitin	410.125	22.9165,0	39	305	1.19324e-05	4.09074e-10	1.54922e-05	3.33485e-10	2.29143e-10	1.24223e-05	3.04038e-05	2.29769e-10	4.03829e-05	2.07757e-05	3.14215e-05	2.32747e-10	3.17382e-05	1.68291e-05	1.92321e-10	1.07905e-05	2.70507e-10	5.19375e-05	2.02699e-10	1.77865e-10	1.95328e-05	3.02243e-05	3.24591e-05	2.22728e-10	2.39935e-10	2.58808e-10	2.05084e-10	3.68503e-05	2.60434e-05	2.14164e-10	1.39747e-05	3.63365e-05	1.74979e-05	3.42251e-05	3.544e-10	1.04947e-05	1.79445e-10	3.27053e-10	1.89795e-05	2.76025e-10	3.18323e-10	1.70644e-10	4.97681e-10	2.27276e-10
867	Analyte 1300	482.85	22.9816,0	53	204	0.000149765	0.000208942	2.33903e-10	0.000220073	2.29143e-10	0.000196791	0.00026302	0.000181837	0.000282816	3.52643e-10	0.000279271	2.32747e-10	0.000185051	0.000170661	1.92321e-10	2.51893e-10	2.70507e-10	0.000325688	2.02699e-10	1.77865e-10	0.000139908	1.87964e-10	0.000142422	2.22728e-10	0.000269413	0.000154148	2.05084e-10	0.000161951	0.000160821	0.000134219	0.000120893	4.29156e-10	2.9087e-10	2.46268e-10	3.544e-10	0.000260602	0.000201073	0.000224866	0.000249173	0.000161694	3.18323e-10	1.70644e-10	0.000360512	0.000157382
874	Analyte 1309	0	23.1045,0	69	290	0.000360348	0.0001203	0.000188211	0.000186333	0.000443819	0.000314252	0.00010841	0.000223356	0.000105132	9.36586e-05	0.000119029	0.000264813	0.000191514	0.000448589	0.000421806	0.000139792	0.000445848	8.92307e-05	0.000241072	1.77865e-10	0.000138048	0.00031949	0.000162839	0.000160402	0.000369151	0.000106419	0.000512141	0.000138667	0.000285744	0.000155523	0.000228465	4.9148e-05	0.000246553	0.000324324	0.000150073	0.000240053	0.000176246	0.000173332	0.00015888	0.000209387	3.18323e-10	0.000198587	0.000164274	0.000286212
879	Analyte 1322	530	23.3468,0	62	204	0.00120881	0.000499017	0.000716731	0.000578999	0.00145402	0.00103343	0.000305358	0.000691416	0.000508676	0.000535356	0.000423488	0.00191531	0.000480545	0.000779807	0.00169037	0.000423061	2.70507e-10	0.000409035	3.77858e-05	1.77865e-10	0.000445766	0.000914956	0.000407633	0.00071913	0.00154484	0.000514906	0.00138427	0.000484384	0.000963252	0.000394478	0.000715495	4.29156e-10	0.000924944	2.46268e-10	0.00113891	0.00082651	0.00108186	0.00141057	0.00150181	2.76025e-10	3.18323e-10	0.000828138	0.00111716	1.97926e-05
882	Analyte 1328	554.636	23.5066,0	54	246	0.000449647	0.000233918	0.000417256	0.000352443	0.00115826	1.96134e-10	8.54335e-05	2.29769e-10	0.00012755	0.000111297	4.74697e-05	0.000373035	0.000245973	1.93412e-10	0.00104328	0.000123719	2.70507e-10	8.73183e-05	0.000187009	1.77865e-10	0.000189721	0.000494379	0.000212424	2.22728e-10	2.39935e-10	2.58808e-10	2.05084e-10	0.000121592	0.000558179	2.14164e-10	0.000220663	4.29156e-10	0.000440765	0.000597389	3.544e-10	0.000425587	0.000425119	0.000332882	0.000256648	0.000389928	3.18323e-10	0.000448747	0.000289793	0.000454599
887	sucrose	874.197	23.58,0	67	361	0.00528426	0.000583153	2.33903e-10	0.00108139	2.29143e-10	0.00107817	0.00393848	0.00345624	0.0031233	0.000381881	0.00195646	0.0083144	0.000343578	0.000880895	0.00295936	0.00585953	0.000553553	0.00351496	0.00499182	1.77865e-10	0.000255746	0.00045444	2.15301e-10	0.00225354	0.000459454	0.000483389	0.0013657	0.000269262	0.00100082	2.14164e-10	0.00182813	0.00382474	0.00289794	2.46268e-10	0.0106894	0.00169693	0.00312899	0.000568159	0.00160464	0.00126566	3.18323e-10	0.00116023	0.000816902	0.000670908
888	unknown	475.86	23.6383,0	51	236	0.000122174	6.08279e-05	2.33903e-10	0.00011611	2.29143e-10	0.000188492	6.01296e-05	0.000163281	4.3619e-05	7.86999e-05	9.23199e-05	2.32747e-10	0.000110662	0.000272739	0.000346195	0.000114821	0.000326611	6.61708e-05	0.000195576	1.77865e-10	9.46898e-05	0.000210454	0.000105876	2.22728e-10	2.39935e-10	2.58808e-10	2.05084e-10	2.86053e-10	0.000166729	0.000119878	0.000101869	4.29156e-10	0.000135207	0.00023591	0.000103855	0.000248448	9.31638e-05	0.000161608	9.14311e-05	0.000153606	3.18323e-10	0.000146853	0.000114974	0.000188125
889	Analyte 1338	576	23.8385,0	60	259	0.000317905	0.000180025	0.000174238	3.33485e-10	2.29143e-10	0.000257233	0.00011871	0.000214723	9.42513e-06	1.80137e-05	0.000155707	0.00024707	0.000168854	0.00031347	0.000416523	0.000136124	0.000367654	0.000139245	0.00026506	0.000296694	0.000167769	0.00025312	0.000170319	0.000158467	0.000289509	2.58808e-10	2.05084e-10	0.000183296	0.000231935	0.000158743	0.000180328	0.00023602	9.72997e-05	0.000366133	0.000269364	0.000343984	0.000250123	0.000250301	3.02577e-10	0.000285289	3.18323e-10	0.000232996	0.000252247	2.27276e-10
899	cellobiose 1	923.119	24.1106,0	68	361	0.0151356	0.0439073	0.0135811	0.030875	0.0212932	0.0129035	0.0236712	0.0241473	0.0355744	0.0265179	0.0233396	0.0182597	0.0235502	0.0143836	0.0185632	0.0215864	0.0180196	0.0233069	0.0152299	0.0122883	0.0174687	0.0144196	0.0106541	0.0200533	0.011047	0.00902236	0.0174731	0.018982	0.00972598	0.00939737	0.0191459	0.0341542	0.0252646	0.0284408	0.0374466	0.0347369	0.0185391	0.0349693	0.0320829	0.0297933	3.18323e-10	0.0176162	0.0534927	0.0240234
901	unknown	774.778	24.2302,0	64	204	0.000672539	0.00273719	0.0006065	0.00216534	0.0015499	1.96134e-10	0.00221601	0.00133327	0.00283249	0.00301719	0.00246368	0.00117624	0.00147558	0.00074494	0.000650152	0.00213762	0.00134443	0.00295955	0.00111639	0.00109331	0.000903699	0.000569043	0.000447014	0.000380197	0.00114138	2.58808e-10	2.05084e-10	0.00139049	0.000582786	2.14164e-10	0.0012569	0.00279976	0.00114175	2.46268e-10	0.00189352	0.00155434	0.000789766	0.0026912	0.00168248	0.00147039	3.18323e-10	0.000890286	0.00495048	0.00129275
913	Lactobionic Acid 1	761.439	24.6107,0	67	204	0.00272935	0.00200608	0.00486571	0.00248353	0.009591	0.00475599	0.00168917	0.00238162	0.00254844	0.00202669	0.00177554	0.00464829	0.00214387	0.00459064	0.00766222	0.00223774	0.00747465	0.0015537	0.000906267	0.00527154	0.00149001	0.00450352	0.00204211	0.00351522	0.00594099	2.58808e-10	0.00662133	0.00169879	0.00465368	0.00214917	0.00353189	0.000707564	0.00277905	0.00513712	0.00334873	0.00288156	0.00296041	0.00498859	0.00252497	0.00113936	3.18323e-10	0.00341997	0.00358482	0.000802205
918	5'-methylthioadenosine 1	701.8	24.7927,0	66	236	0.000187235	0.000100752	0.000145645	0.000115076	2.29143e-10	0.000181534	5.29103e-05	0.000170552	3.98101e-05	8.43555e-05	0.000111707	0.000125689	0.00012764	0.000324512	0.000345575	9.81707e-05	0.000323239	5.10094e-05	0.000205281	0.00023476	6.17361e-05	0.000242298	0.00010769	2.22728e-10	0.000199695	2.58808e-10	0.000399974	9.08617e-05	0.000145886	0.000103986	0.000145919	5.71003e-05	0.000155901	0.000320429	0.000176513	0.000337045	0.000185566	0.000217329	0.000131844	0.000239586	3.18323e-10	0.000192131	0.0001237	0.000199204
924	Gentiobiose 2	723.179	25.0148,0	28	204	1.73992e-10	0.000699484	1.03768e-05	0.000213195	0.000534453	0.000176009	0.000291573	1.6616e-05	0.000136386	0.000419092	0.000212237	2.32747e-10	0.000235462	0.000374395	1.92321e-10	0.000259126	0.00037489	0.000261767	0.00042341	0.00011856	0.000552899	1.87964e-10	2.15301e-10	2.22728e-10	2.39935e-10	2.58808e-10	2.05084e-10	2.86053e-10	1.90325e-10	2.14164e-10	0.000176998	4.29156e-10	2.9087e-10	2.46268e-10	3.544e-10	3.74856e-10	1.79445e-10	3.27053e-10	3.02577e-10	2.76025e-10	3.18323e-10	1.70644e-10	4.97681e-10	2.27276e-10
928	Palatinose	399.167	25.1578,0	44	277	0.000150337	0.000124408	6.36327e-05	3.33485e-10	2.29143e-10	1.96134e-10	4.45107e-05	0.00021463	5.17545e-05	1.89443e-05	5.51068e-05	0.000154978	8.07034e-05	0.00010776	1.92321e-10	3.47532e-05	0.000239958	4.67462e-10	2.02699e-10	1.77865e-10	6.11439e-05	0.000123309	3.49842e-05	6.79943e-05	0.000158554	2.58808e-10	0.000133015	2.86053e-10	1.90325e-10	2.14164e-10	6.4016e-05	2.98545e-05	0.000149273	2.46268e-10	3.544e-10	3.74856e-10	0.000156274	3.27053e-10	3.02577e-10	2.76025e-10	3.18323e-10	6.03043e-05	4.97681e-10	0.000149237
932	Isomaltose 1	753.448	25.2518,0	58	361	1.73992e-10	2.52683e-05	9.53604e-05	0.000108211	5.14615e-05	0.000148197	7.70179e-07	2.29769e-10	3.85232e-05	2.83131e-05	4.42582e-05	2.32747e-10	2.35659e-05	0.000188256	7.3283e-05	5.08297e-05	2.70507e-10	4.58422e-05	0.000223814	1.77865e-10	0.00012069	1.87964e-10	1.94472e-05	1.2189e-05	2.39935e-10	6.83619e-05	2.05084e-10	1.70216e-05	0.000142904	2.48769e-05	5.17148e-05	9.81954e-06	0.000209107	2.46268e-10	0.000153215	0.000160296	1.79445e-10	8.04555e-05	0.000139202	7.18603e-05	3.18323e-10	1.70644e-10	3.35241e-05	3.76667e-05
943	(+/-)-Taxifolin	334.1	25.8159,0	62	221	7.34102e-05	8.62131e-05	0.000117211	0.000183793	0.000134268	6.98064e-05	5.81913e-05	6.50905e-05	6.43386e-05	6.41105e-05	5.21508e-05	5.99371e-05	5.99101e-05	6.65372e-05	5.12522e-05	4.12751e-05	3.05445e-05	4.67462e-10	2.58888e-05	4.99606e-05	4.70065e-05	7.90504e-05	7.76338e-05	7.67826e-05	2.39935e-10	3.67257e-05	2.05084e-10	3.86683e-05	3.52255e-05	4.82094e-05	5.97731e-05	0.000158655	0.00014588	2.46268e-10	0.000116814	6.14326e-05	5.36475e-05	6.58817e-05	9.53438e-05	8.37177e-05	3.18323e-10	4.3642e-05	6.66144e-05	6.22319e-05
944	Analyte 1428	586	25.9072,0	62	204	0.000194184	0.000152942	0.000195423	0.000165764	0.000395233	0.000182292	7.70624e-05	0.000155209	9.61797e-05	0.000106625	0.000130025	0.000185939	0.000125633	0.000321601	0.000292264	0.000143105	2.70507e-10	9.31477e-05	0.00019243	0.000274828	0.00013361	0.000173605	0.000113904	0.000113565	0.000172696	2.58808e-10	2.05084e-10	2.86053e-10	0.000170917	3.67922e-05	0.000146499	0.000136507	0.000198217	0.000261654	0.000241854	0.000239533	0.000179056	3.27053e-10	0.000514815	0.000215543	3.18323e-10	0.000184697	0.000144241	0.000142042
971	3,7,12-Trihydroxycoprostane 1	402.455	27.303,0	38	129	1.73992e-10	4.09074e-10	3.41224e-05	3.33485e-10	7.87228e-05	4.05779e-05	3.47496e-10	2.29769e-10	3.69644e-10	3.52643e-10	3.36251e-10	2.43033e-05	2.50734e-10	4.73915e-05	4.4186e-05	2.51893e-10	2.70507e-10	4.67462e-10	2.52481e-05	5.9154e-05	2.17118e-10	4.37012e-05	2.7755e-05	1.71258e-05	2.39935e-10	2.58808e-10	7.41964e-05	2.86053e-10	4.26261e-05	2.14164e-10	1.86372e-05	4.29156e-10	2.9087e-10	5.49164e-05	3.544e-10	3.11914e-05	1.79445e-10	2.91146e-05	3.02577e-10	4.30473e-05	3.18323e-10	6.1807e-05	4.97681e-10	4.37987e-05
976	Analyte 1477	361	27.7379,0	53	73	0.000502446	0.00020622	0.00017595	0.000169521	0.00054442	0.000288329	8.2376e-05	0.000201143	3.69644e-10	8.26375e-05	8.98268e-05	0.000233497	0.000123245	1.93412e-10	0.000366566	0.000114694	2.70507e-10	0.000261173	0.000282945	1.77865e-10	0.000179318	0.000314115	0.000221494	0.000184257	0.000430842	0.000109492	0.000303972	0.000433639	0.000198089	2.14164e-10	0.00020334	0.000306309	0.000475267	0.00058694	0.000331845	0.000391683	0.000438929	0.00037426	0.00024378	2.76025e-10	3.18323e-10	8.12416e-05	0.000173345	0.000457386
991	maltotriose 1	473.8	29.6028,0	56	204	1.73992e-10	4.09074e-10	0.00016886	0.000332868	2.29143e-10	7.42634e-05	4.43567e-05	9.47532e-05	7.97037e-05	4.87966e-05	5.87718e-05	5.2442e-05	5.19275e-05	0.00011131	0.000117637	3.34566e-05	3.53357e-05	0.000113639	2.02699e-10	0.000136618	2.17118e-10	6.23232e-05	5.26886e-05	7.62428e-05	2.87011e-05	2.58808e-10	0.000118937	4.8214e-05	4.134e-05	3.37123e-05	6.723e-05	0.00037011	0.000191178	2.46268e-10	0.000161015	0.000103376	0.000113358	0.000146624	3.02577e-10	0.000130995	3.18323e-10	7.91669e-05	9.13668e-05	8.86898e-05
[truncated: 27 more columns]
